1

2

3

4 **The nuclear receptor DHR3/Hr46 is required in the**  
5 **blood brain barrier of mature males for courtship**

6

7 Chamala Lama, Cameron R. Love, Hoa Nhu Le, Jyoti Lama and Brigitte Dauwalder\*

8

9 Department of Biology and Biochemistry, University of Houston, Houston, TX,

10 United States

11

12

13 \*Corresponding author

14 [bdauwalder@uh.edu](mailto:bdauwalder@uh.edu)

15

16 Short title: Blood brain barrier transcripts and male courtship

## 17 **Abstract**

18 The blood brain barrier (BBB) forms a stringent barrier that protects the brain from  
19 components in the circulation that could interfere with neuronal function. At the  
20 same time, the BBB enables selective transport of critical nutrients and other  
21 chemicals to the brain. Many of these processes are still poorly understood. Beyond  
22 these functions, another recently recognized function is even less characterized,  
23 specifically the role of the BBB in modulating behavior by affecting neuronal  
24 function in a sex dependent manner. Notably, signaling in the adult *Drosophila* BBB  
25 is required for normal male courtship behavior. Courtship regulation also relies on  
26 male-specific molecules in the BBB. Our previous studies have demonstrated that  
27 adult feminization of these cells in males significantly lowered courtship. Here, we  
28 conducted microarray analysis of BBB cells isolated from males and females.  
29 Findings revealed that these cells contain male- and female-enriched transcripts,  
30 respectively. Among these transcripts, nuclear receptor DHR3/Hr46 was identified  
31 as a male-enriched BBB transcript. DHR3/Hr46 is best known for its essential roles  
32 in the ecdysone response during development and metamorphosis. In this study, we  
33 demonstrate that DR3/Hr46 is specifically required in the BBB cells of mature males  
34 for courtship behavior. The protein is localized in the nuclei of sub-perineurial glial  
35 cells (SPG), indicating that it might act as a transcriptional regulator. These data  
36 provide a catalogue of sexually dimorphic BBB transcripts and demonstrate a  
37 physiological adult role for the nuclear receptor DH3/Hr46 in the regulation of male  
38 courtship, a novel function that is independent of its developmental role.

39

## 40 **Author summary**

41 The blood brain barrier very tightly regulates which molecules can enter the brain.

42 This is an important protection for the brain, however, it also complicates

43 communication between molecules in the circulating fluid and the brain. In fly

44 courtship, for example, circulating male-specific products are crucially required for

45 normal courtship. But the neuronal circuits that ultimately control the behavior are

46 inside the brain, separated from these molecules by the blood brain barrier. The

47 mechanisms of this communication are not known. Here we show that the blood

48 brain barrier itself contains sex-specific RNAs and we show that one of them, a

49 nuclear receptor called DHR3, is required in adult males for normal courtship. These

50 findings promise new insight into the communication between blood brain barrier

51 and the brain.

52

## 53 **Introduction**

54 It is well established that the two layers of glial cells that tightly surround the

55 nervous system form the *Drosophila* blood brain barrier (BBB)(1). Flies have a non-

56 vascular open circulatory system that distributes the hemolymph. The BBB forms

57 the tight exclusion barrier that is essential to protecting neurons from hemolymph

58 components that could interfere with neuronal function (2, 3). At the same time, the

59 barrier needs to allow selective uptake of nutrients and other molecules needed for

60 brain function. The *Drosophila* blood brain barrier (BBB) surrounds the brain like a  
61 tight cap. It consists of two layers of glial cells. The outer perineurial glia cells (PG  
62 cells) are thought to function as a barrier for large-molecular weight molecules. The  
63 inner layer, the subperineurial glia (SPG), is adjacent to the neuronal cell bodies and  
64 contains the tight junctions that form the physical barrier (Fig 1A). It has been  
65 shown in a number of genetic and functional studies that the barriers in flies and  
66 vertebrates share not only structure and function, but also many homologous  
67 proteins that ensure their function, as shown in (4). A recent microarray study of  
68 isolated BBB cells has expanded on these earlier findings and shown that besides  
69 the characteristic barrier proteins, fly and mouse BBB cells share a large number of  
70 conserved proteins (5). That study has also provided the first detailed “inventory” of  
71 these cells in *Drosophila*. While the barrier and selective uptake functions of the BBB  
72 are its most obvious essential function, evidence is starting to accumulate that other  
73 physiological processes in BBB cells are contributing to brain function. For example,  
74 the G-protein-coupled receptor *moody* is specifically expressed in the subperineurial  
75 glial cells (SPG)(6, 7). While the absence of both *moody* isoforms leads to a leaky  
76 BBB (6, 7), mutants with only one of the isoforms have intact barriers, but  
77 behavioral defects in their response to cocaine and alcohol (6). In addition, *moody*,  
78 in a function independent of its function in barrier integrity, is also required in BBB  
79 cells for normal male courtship (8). That active signaling processes in BBB cells  
80 regulate neuronal output was further indicated by the finding that BBB-specific  
81 reductions in the G protein Galpha(o) cause courtship defects, while leaving the  
82 barrier integrity intact (8). It has been found that the circulating hemolymph

83 contains male-specific factors from the fat body that are needed to ensure normal  
84 courtship (9). It is not clear how these factors interact with the male brain circuits  
85 that regulate the behavior. Here we examine whether the BBB expresses sex-  
86 specific transcripts that might be part of this communication. This would be in  
87 agreement with the finding that feminization of the BBB by expression of the  
88 feminizing TRA protein specifically in the BBB of adult males results in a significant  
89 reduction in male courtship (8). In these experiments, the tightness of the barrier  
90 was unaffected, suggesting that specific male transcripts are physiologically  
91 participating in courtship control. The identity of these factors and their function is  
92 unknown. Here we identify sex-preferentially expressed transcripts in the BBB of  
93 males and females and demonstrate that the nuclear receptor DHR3/Hr46, best  
94 known for its roles in larval development (10-12), is physiologically required in the  
95 BBB of adult mature males to ensure normal male courtship behavior.

96

## 97 **Results**

### 98 A microarray screen identifies male- and female-enriched transcripts in the BBB

99 In our previous experiments, there was a strong reduction in male courtship when  
100 we conditionally feminized adult BBB cells (8). This suggests that feminization  
101 disrupts male-specific transcripts that are physiologically required for normal  
102 mating behavior. In order to identify these transcripts, we isolated BBB cells from  
103 males and females and characterized their transcripts. The Gal4/UAS system was  
104 used to mark these cells (13). We expressed the fluorescent protein DsRed in the

105 nuclei of SPG cells, using the *moody-Gal4* driver that drives expression in SPG cells  
106 (*SPG-Gal4*) (6). As seen in Fig 1B, the large nuclei of the SPG cells were specifically  
107 marked. We dissected fly brains and manually removed and collected fluorescent  
108 cells. Cells from approximately 50 flies were pooled for each biological replicate,  
109 and the RNA of three biological replicas from separate crosses was prepared for  
110 each sex. The RNA was subsequently used for microarray analysis by GenUs  
111 Biosystems (<http://www.genusbiosystems.com/>). The results confirmed the  
112 presence of sex-preferentially expressed transcripts in the BBB of males and  
113 females, respectively. 284 transcripts were identified that were enriched > 2 fold in  
114 either males and females (Figures 2C, D). Of those, 112 were male-preferentially  
115 expressed (S1 Table). As expected, the male-specifically expressed *rox* RNAs that are  
116 required for dosage compensation were highly specific to males. Furthermore, sex-  
117 specific *dsx* transcripts were identified because male and female transcripts use  
118 different polyA-sites and can thus be identified by microarray (14). An analysis of  
119 the GeneOntology of the enriched transcripts is shown in Table S2. Sex specific  
120 categories such as dosage compensation and sex determination are well  
121 represented, further confirming that the isolated cells are sexually determined.  
122 About half of the genes fall into one of these categories. The rest of the genes could  
123 not be assigned to a specific category. In addition to identifying sex-preferentially  
124 expressed RNAs, the experiment also provided an inventory of RNAs present in the  
125 BBB cells. The vast majority of BBB transcripts is equally expressed in males and  
126 females. Among them, as predicted for SPG cells, were RNAs that are characteristic  
127 of BBB cells (4, 5): RNAs for the junction proteins *sinu* and *neurexin*, for example,

128 and the previously characterized SPG transcripts for *moody* and *Mdr65*. The most  
129 likely contaminating cells from the dissections would be fat body cells which are in  
130 close proximity to the BBB, and neuronal cells. We found very small amounts of the  
131 fat body transcript *Lsp-2*, or of the neuronal marker *elav*. They were not  
132 preferentially present in males or females, indicating that low amounts of these cells  
133 are unlikely to affect the identification of sex-specific transcripts in the BBB.

134

135 The nuclear receptor DHR3/Hr46 is required in the BBB for courtship

136 One of the male-enriched BBB RNAs is the transcript for the nuclear receptor  
137 *DHR3/Hr46* (Fig 1E). *DHR3/Hr46* is an orphan nuclear receptor that is most related  
138 to the mammalian ROR receptor (Retinoic acid related orphan receptor).  
139 *DHR3/Hr46* is a well-described transcriptional regulator of larval developmental  
140 processes in response to ecdysone, but no adult functions have been described so  
141 far. To examine whether *DHR3/Hr46* is required in the BBB for courtship we  
142 conditionally expressed two different *DHR3/Hr46-RNAi* constructs specifically in the  
143 BBB of mature adult males and examined their courtship (Fig 2). Male courtship in  
144 *Drosophila melanogaster* consists of well-defined stereotyped behavioral steps that  
145 can easily be quantified in a courtship index (CI) (15-17). The CI is calculated as the  
146 fraction of time the male spends displaying any element of courtship behavior  
147 (orienting, following, wing extension, licking, attempted copulation, copulation)  
148 within a 10 minute observation period (18). We used the *Gal4/Gal80<sup>ts</sup>* system to  
149 restrict knockdown to mature males (19). Two different *BBB-Gal4* drivers were  
150 used to direct expression, the previously described *SPG-Gal4*, and a SPG-cell-specific

151 *Mdr65-Gal4* driver that was generated in our lab (Fig 2D). The ATP binding cassette  
152 (ABC) transporter *Mdr65* has been shown to be specifically expressed in the SPG  
153 cells of the BBB (20, 21). Control flies containing a copy of just one of the two  
154 respective transgenes were grown, treated and tested in parallel to the knockdown  
155 flies as controls. At 18°C, Gal4 is inhibited by Gal80<sup>ts</sup>, and *DHR3/Hr46-RNAi* is not  
156 expressed. At this temperature, all genotypes exhibited normal courtship. In  
157 contrast, following induction at 32°C, males expressing *DHR3/Hr46-RNAi* in the BBB  
158 had significantly reduced courtship ( $p \leq 0.001$ ) (Figs 2A, B). Reduction was observed  
159 with both drivers in combination with either of two different *UAS-DHR3/Hr46-RNAi*  
160 constructs. While courtship was reduced, the males were capable of performing all  
161 of the steps of courtship, but they did so with lower probability. To eliminate  
162 general sickness of the males as a cause for the reduced courtship, we performed a  
163 short-term activity assay (22) and found no activity defects in the knockdown flies  
164 (Fig 2C). We conclude that *DHR3/Hr46* is required in the BBB of mature males for  
165 normal courtship behavior. SPG BBB cells are glial cells. To confirm the glial  
166 requirement for *DHR3/Hr46* we used the glia-specific driver *repo-Gal4* to drive *UAS-*  
167 *DHR3/Hr46-RNAi* in adult males and observed equally reduced courtship ( $p < 0.001$ )  
168 (Fig 3A). As expected, when we expressed *DHR3/Hr46-RNAi* in the BBB with *Mdr-*  
169 *Gal4* in the presence of a glial-expressed Gal80 blocker (*repo-Gal80*) (23) we  
170 observed a reversal of the courtship defects. Together our findings demonstrate that  
171 *DHR3/Hr46* is needed in the glial SPG cells for normal courtship.

172 To assess whether *DHR3/Hr46* knockdown affects the integrity of the BBB, we  
173 tested the tightness of the BBB by injecting 10kD Texas-Red (TR)-marked Dextran.



174 It is well documented that in wildtype animals TR-Dextran will be kept out of the  
175 brain and accumulate at the BBB, whereas a leaky BBB would allow entry into the  
176 brain (6). As shown in Fig 3E, males expressing *DHR3/Hr46* RNAi have normal BBB  
177 barrier function with the dye accumulating at the barrier. These findings indicate  
178 that BBB integrity is not compromised in the mutants, giving support to a  
179 physiological function for *DHR3/Hr46* in the BBB that is required for normal  
180 regulation of courtship.

181

### 182 DHR3/Hr46 and its ligand are present in SPG nuclei

183 To examine the intracellular distribution of DHR3/Hr46, we used antibodies  
184 generated by the Thummel lab (11) to study the protein distribution in SPG cells of  
185 mature animals (Fig 4). Indy-GFP was used as a BBB marker; it is expressed in both  
186 PG and SPG cells (5). DNA was labeled with DAPI. BBB cells are big flat cells with  
187 large polyploid nuclei (24). Anti-DHR3/Hr46 antibody staining detected  
188 DHR3/Hr46 in the cytoplasm and the nucleus of SPG cells (Figs 4 A-D).  
189 DHR3/Hr46 is a transcriptional activator in larvae, and its presence in the nucleus  
190 of BBB cells is consistent with a transcriptional role in these cells.

191 DHR3/Hr46 belongs to the family of ligand activated nuclear receptors. And while  
192 its ligand is unknown, insertion of the putative ligand binding domain into the Gal4  
193 activation domain results in the transcriptional activation of Gal4 in cells containing  
194 the putative ligand. Palanker et al. have shown that this construct recapitulates  
195 Hr46 activation in cells where Hr46 transcriptional activity has been observed (25).

196 Binding of the putative ligand activates *Gal4<sup>LBD(DHR3)</sup>* whose activity can then be  
197 visualized by a *UAS-reporter*. Importantly, in the construct, the *Gal4<sup>LBD(DHR3)</sup>*  
198 reporter is driven by a *hsp70* heat shock promoter (*hsp70-Gal4<sup>LBD(DHR3)</sup>*). This makes  
199 it possible to interrogate the presence of the ligand at a time of choice. We induced  
200 the *Gal4<sup>LBD(DHR3)</sup>* ligand sensor in mature males by exposing the flies to 37 degrees  
201 Celsius for one hour and fixed their brains four hours later. We combined *hsp70-*  
202 *Gal4<sup>LBD(DHR3)</sup>* with *UAS-dsRed* to visualize Gal4 activity, and *indy-GFP* for visualization  
203 of the BBB. As shown in Figs 4 E-G, dsRed staining is observed in the large nuclei of  
204 SPG cells, indicating that the ligand for Hr46 is present in these cells in adult mature  
205 males. Together our findings support a scenario in which Hr46 is activated and  
206 physiologically needed in the cells of adult males to support normal male courtship  
207 behavior.

208

## 209 **Discussion**

210 Our microarray screen revealed that the *Drosophila* BBB contains male-enriched  
211 transcripts in males, as well as female-enriched transcripts in females. We have  
212 previously observed a reduction in male courtship when we conditionally feminized  
213 the BBB cells of mature males. Together these findings suggest that sex-specifically  
214 enriched transcripts contribute to a “male-specific” state of BBB cells that shapes its  
215 physiology and its dynamic interaction with the brain to modulate courtship. The  
216 previous feminization experiments were done in mature adult males by conditional  
217 induction of the female-specific TRA protein (26). TRA is a master controller of sex

218 determination by virtue of its direct control of the two major sex specific  
219 transcription factors DSX and FRU, which in turn control a multitude of genes (27,  
220 28). Non-induced males were normal, demonstrating that it was the acute adult  
221 change in transcripts that resulted in disturbed courtship. In the microarray  
222 experiments described here we sampled all transcripts that were present in the BBB  
223 cells of mature males and females. These animals were of the same age as the flies in  
224 the TRA induction studies. Neither males nor females had mating experience. The  
225 sex-specific transcripts we identify here therefore likely include transcripts that  
226 were affected in the feminization experiment.

227 We identified a total of 284 sex-preferentially expressed transcripts. It is likely that  
228 a number of them are required in the regulation of sex-specific behaviors and that  
229 their disruption will affect courtship. Identifying them holds the promise of insight  
230 into the physiological processes that underlie BBB-brain communication that is  
231 required for normal courtship. However, there will likely also be commonly  
232 expressed transcripts that participate in these sex-specific processes as they  
233 interact with sex-specific partners or regulators, or respond to sex-specific incoming  
234 signals. The majority of identified SPG transcripts are equally expressed in males  
235 and females, representing an insight into the overall transcriptional “makeup” of  
236 SPG cells of mature males and females. We expect many of them to overlap with the  
237 transcripts identified by deSalvo et al. (5). In contrast to our study, their  
238 characterization included both layers of the BBB, PG and SPG cells, without  
239 distinguishing between males and females.

240 DHR3/Hr46 belongs to the nuclear-receptor superfamily that is characterized by  
241 the presence of a highly conserved DNA-binding domain (DBD) and a less conserved  
242 C-terminal ligand-binding and dimerization domain (LBD). The ligand for  
243 DHR3/Hr46 is unknown, but the reporter construct made by Palanker et al. strongly  
244 indicates that a ligand exists that binds to the LBD in the receptor (25). In larvae,  
245 Palanker et al. observed fairly widespread, but not ubiquitous, activation, including  
246 in the fat body, leading to the speculation that DHR3 might have metabolic  
247 functions. ROR, the mammalian homologue of DHR3, is known to bind cholesterol  
248 and play a role in lipid homeostasis. Flies do not produce cholesterol, but take it up  
249 from their diet and it is an important precursor for the steroid ecdysone among  
250 other roles. Another nuclear receptor, DHR96 has been shown to bind cholesterol in  
251 *Drosophila* and to be essential for cholesterol homeostasis (29), but this does not  
252 exclude a role for DHR3/Hr46. Palanker et al. observed strong Gal4<sup>DHR3LDB</sup> reporter  
253 expression in tissues of late third instars, with expression dropping in pre-  
254 pupariation, but strong activation was observed again in late pupae. We show here  
255 activation of the reporter construct in the BBB of mature adult males. In these  
256 experiments, the reporter construct is conditionally induced by a heat pulse in  
257 mature males. Thus, the observed activation reflects a “snapshot” of the presence of  
258 the putative ligand at that time. The observed activity coincides with the time when  
259 knockdown of DHR3 causes a reduction in courtship.

260 DH3/Hr46 is best known for its essential role in development as an ecdysone  
261 effector. It is activated by ecdysone and is a part of an activation cascade in response  
262 to ecdysone. It induces another nuclear receptor, Ftz-F1, among numerous other

263 genes. Eventually, it acts as a negative feedback regulator to turn off ecdysone-  
264 receptor signaling (10-12, 30, 31). DHR3/Hr46 has essential functions during  
265 embryogenesis, prior to molts, and at the onset of metamorphosis. To our  
266 knowledge, this is the first report of an adult non-developmental role for  
267 DHR3/Hr46. Our conditional knockdown experiments demonstrate that its  
268 presence in the BBB of mature males is needed for normal courtship. Whether this  
269 reflects a role for an ecdysone-induced signaling cascade and transcriptional  
270 activation of downstream targets remains to be determined. Data from (32) suggest  
271 that ecdysone and the ecdysone receptor (EcR) are present in the BBB. We have  
272 likewise found in our screen that *EcR* and *ftz-F1* RNAs are present in SPG cells in a  
273 non-sex-specific manner. In analogy to its developmental role, DHR3/Hr46 most  
274 likely acts as a transcriptional regulator. Our observation that the Hr46 protein is  
275 present in SPG nuclei supports this interpretation. However, in an unexpected  
276 finding Montagne et al have identified DHR3 as a S6K interacting protein in late  
277 larvae/prepupae (33). Intriguingly, this function required a novel form of DHR3 that  
278 did not contain the DNA binding domain, but did require the ligand binding domain.  
279 The presence of this altered form of DHR3 increased phosphorylation activity of  
280 S6K. This finding, together with the short time scale of the response led the authors  
281 to propose an alternative non-genomic role of DHR3, possibly as a mediator of the  
282 metabolic state of these cells. We do not know whether this isoform plays a role in  
283 courtship and whether DHR3 might have a role that is independent of EcR in the  
284 BBB, conceivably in addition to the transcriptional role that is suggested by its  
285 presence in the nucleus.

286 Taken together, the data presented here demonstrate an adult physiological role for  
287 DHR3/Hr46, a nuclear receptor mainly known for its crucial function in  
288 development, in the glial cells of the BBB where it is required for the regulation of  
289 normal male courtship.

290

## 291 **Materials and Methods**

292

### 293 Fly stocks

294 *SPG-Gal4/TM3* (6) was a gift from Roland Bainton, UCSF. *tubP-Gal80<sup>ts</sup>/CyO* and *tubP-*  
295 *Gal80<sup>ts</sup> /TM3,Sb* flies were a gift from Gregg Roman (University of Mississippi).

296 *DHR3/Hr46* RNAi lines *y<sup>1</sup> v<sup>1</sup>;P{TRiP.JF02542}attP2* (BL 27253) and *y<sup>1</sup> v<sup>1</sup>;*

297 *P{TRiP.JF02543}attP2* (BL 27254); *w<sup>1118</sup>; P{w[+mC]=UAS-RedStinger (dsRed)}4/CyO*

298 (BL 8546); *w\**; *P{PTT-GC}IndyYC0017/TM6C, Sb1 (Indy-GFP)* (BL 50860) were

299 obtained from the Bloomington *Drosophila* stock center (<https://bdsc.indiana.edu/>).

300 *y, repo-Gal4* on X was a gift from Takeshi Awasaki (University of Massachusetts (23);

301 The *y* mutation was removed by recombination. *w; Pin, repo-Gal80/CyO* flies were a

302 gift from Rob Jackson (Tufts University). *Pin* was removed by recombination. *w; +;*

303 *repo-Gal80* flies (23) were a gift from Christian Klämbt (University of Münster).

304 *w<sup>1118</sup>; P{w[+mC]=hs-GAL4-DHR3.LBD}* was a gift from Carl Thummel (University of

305 Utah).

### 306 Gal80<sup>ts</sup> experiments

307 *tubP-Gal80<sup>ts</sup>* carrying flies and control flies were raised at 18°C. Virgin males were

308 collected at eclosion and kept in individual vials for 5–8 days at 18°C. Flies were

309 then placed at 32°C for 24 hours for induction. Following induction, induced and  
310 uninduced flies were kept at 25°C overnight prior to courtship assays.

311

### 312 Behavioral assays

313 The courtship assay and activity assay were performed as previously described  
314 (34). In short, males were placed in a plexiglass “mating wheel” (diameter 0.8 cm),  
315 together with a 2–4 hrs old *Canton-S* virgin female. The courtship index was  
316 calculated as the fraction of time the male spent displaying any element of courtship  
317 behavior (orienting, following, wing extension, licking, attempted copulation,  
318 copulation) within a 10-minute observation period (18). Short-term activity assays  
319 were performed as previously described (22). Individual males were placed into the  
320 “mating wheel” containing a filter paper with a single line dividing the chamber in  
321 half. After 2–3 minutes of acclimation time, the number of times the male crossed  
322 the center line within the three-minute observation time was counted.

323 Each graph represents sets of control and experimental genotypes that were grown,  
324 collected, aged and tested in parallel. In each behavioral session, equal numbers of  
325 all genotypes were tested.

326

### 327 Microarray analysis

328 To isolate blood-brain barrier cells, flies bearing the *SPG-Gal4* driver were crossed  
329 to flies carrying the fluorescent reporter transgene, *UAS-DsRed*. This resulted in the  
330 expression of the visible fluorescent marker DsRed to mark the nuclei of BBB cells.

331 Prior to the experiment, both the driver *SPG-Gal4* and the *UAS-DsRed* lines were

332 outcrossed with a Cantonized *w<sup>1118</sup>* strain for 10 generation. The flies were grown in  
333 a 25°C incubator under a 12hrs light/12hrs dark cycle. Eclosing males and females  
334 were collected and kept in separate groups of 10-15 flies of the same sex under the  
335 same conditions for 4 days and then dissected between ZT 5 and ZT 7 to control for  
336 levels of cycling transcripts. Equal numbers of males and females originating from  
337 the same culture were dissected in each sitting. The brains were dissected in ice-  
338 cold 1 X PBS. The dissected brains were then transferred to a new petri dish  
339 containing ice-cold 1X PBS within half an hour. Carefully, under the fluorescent  
340 microscope, individual and/or groups of blood-brain barrier cells marked with  
341 DsRed were isolated manually by using Dumont # 5 SF superfine forceps (Fine  
342 Science Tools, Inc). The cells were then immediately transferred to a frozen droplet  
343 of Trizol reagent on dry ice and stored in -80°C until further processing. Cells were  
344 isolated from at least 50 brains for each genotype. The approximate total number of  
345 cells isolated per brain varied from ~60-120. The forceps were cleaned with  
346 RNAPrep when moving from one genotype to the other.

347 The isolated BBB cells of male and female flies were provided to GenUs Biosystems  
348 (<http://www.genusbiosystems.com/>) for microarray analysis. A total of 3 biological  
349 replicates for males and females were submitted. Cells were lysed in TRI reagent  
350 (Ambion) and Total RNA was isolated using phenol/chloroform extraction followed  
351 by purification over RNeasy spin columns (Qiagen). The concentration and purity of  
352 Total RNA was measured by spectrophotometry at OD260/280 and the quality of  
353 the Total RNA sample was assessed using an Agilent Bioanalyzer with the RNA6000  
354 Nano Lab Chip (Agilent Technologies). Labeled cRNA was prepared by linear



355 amplification of the Poly (A)+ RNA population within the Total RNA sample. Briefly,  
356 1 µg of Total RNA was reverse transcribed after priming with a DNA oligonucleotide  
357 containing the T7 RNA polymerase promoter 5' to a dT(24) sequence. After second-  
358 strand cDNA synthesis and purification of double-stranded cDNA, in vitro  
359 transcription was performed using T7 RNA polymerase. The quantity and quality of  
360 the cRNA was assayed by spectrophotometry and on the Agilent Bioanalyzer. One  
361 microgram of purified cRNA was fragmented to uniform size and applied to  
362 *Drosophila* (V2) Gene Expression microarray (Agilent Technologies, Design ID  
363 021791) in hybridization buffer. Arrays were hybridized at 37° C for 18 hrs in a  
364 rotating incubator, washed, and scanned with a G2565 Microarray Scanner (Agilent  
365 Technologies). Arrays were processed with Agilent Feature Extraction software and  
366 data was analyzed with GeneSpring GX software (both Agilent Technologies). To  
367 compare individual expression values across arrays, raw intensity data from each  
368 gene was normalized to the 75th percentile intensity of each array. Genes with  
369 values greater than background intensity in all female or all male replicates were  
370 filtered for further analysis. Differentially expressed genes were identified with fold  
371 change > 2-fold and Welch Ttest, p-value < 0.05.

372 The data discussed in this publication have been deposited in NCBI's Gene  
373 Expression Omnibus and are accessible through GEO Series accession number GSE  
374 157122 (<https://www.ncbi.nlm.nih.gov/geo/query/acc.cgi?acc=GSE157122>).

375

376 Generation of Mdr65-Gal4 transgenic flies

377 650 bp of sequence upstream of the *Mdr65* coding sequence was PCR amplified from  
378 *CS* genomic DNA using the primers  
379 5'*cggaattc*(EcoRI)*TCCATCACTTAGCAAAGCAGACTTCAATC* and 5'*cgggatcc*(BamH1)  
380 *GGTGATGTTTAGTCGGCACTGACGA* and inserted into the *Drosophila* transformation  
381 vector *pGATN* to create *Mdr65-Gal4*. In *pGATN*, expression of the yeast transcription  
382 factor Gal4 is driven by the inserted promoter sequences (13). Transgenic flies were  
383 generated by *Rainbow Transgenic Flies* (<https://www.rainbowgene.com/>) by P-  
384 element mediated insertion. The expression pattern in *Mdr65-Gal4* transgenic lines  
385 was examined by crosses to *UAS-dsRed* (nuclear) or *UAS-mcD8-dsRed*.

386

### 387 Immunohistochemistry

388 Immunohistochemistry on isolated brains was performed as described in Li et al.  
389 (35). The DHR3/Hr46 antibody was a gift from Carl Thummel, University of Utah  
390 (11) and was used at 1:50 dilution. To visualize BBB cells, flies carrying *Indy-GFP*  
391 were used for anti-DHR3/ anti-GFP double staining. *Indy-GFP* marks BBB cells (36).

392 Antibodies used:

393 Rabbit anti-DHR3, 1:50 (gift of Carl Thummel, University of Utah (11)); Rabbit anti-  
394 RFP (abcam ab62341), 1:200; chicken anti-GFP (abcam ab13970), 1:500; Alexa  
395 Fluor 555 goat anti-rabbit (Invitrogen A21429) 1:200; Alexa Fluor 635 goat anti-  
396 mouse (Invitrogen A31575) 1:200; Alexa Fluor 488 goat anti-chicken (Thermo  
397 Fisher Scientific A-11039).

398

399 Injection of 10kd Dextran-TR to assess the integrity of the BBB was performed as  
400 described in Hoxha et al. (8).

401

#### 402 Test for presence of DHR3/Hr46 ligand

403 *hs-Gal4<sup>LBD(DHR3)</sup>* flies were crossed to *UAS-dsRed(nuclear); indy-GFP* flies. Progeny  
404 were collected at eclosion and kept in small groups of males or females for 4 days.  
405 Expression of *hs-Gal4<sup>LBD(DHR3)</sup>* was induced by placing flies in prewarmed food vials at  
406 37°C for one hour, followed by recovery at room temperature for three hours and  
407 brain isolation. dsRed expression as a measure of Gal4 activation by DHR3 ligand  
408 and GFP (as BBB marker) were assessed by immunohistochemistry.

409

#### 410 Statistical Analysis

411 Two-way analysis of variance (ANOVA) was used to establish overall significance.  
412 Post hoc analysis for multiple comparisons was carried out with Tukey (HSD). P  
413 values < 0.05 were considered statistically significant. All statistical calculations  
414 were done using XLSTAT (Addinsoft, NY, NY) running on Microsoft Excel for Mac  
415 (version 16). All ±error bars are standard error of the mean (SEM).

416

417

#### 418 **Figure legends**

419 **Figure 1. Microarray analysis of isolated SPG cells of the BBB.** (A) Schematic of  
420 the *Drosophila* Blood Brain Barrier (BBB) (modified from (37)). The BBB consists of  
421 two layers of glial cells, the outer Perineurial Glia (PG) facing the circulating  
422 hemolymph, and the inner Subperineurial Glia (SPG) with septate junctions that

423 form the main barrier. The SPG is in contact with the underlying nuclei of the  
424 neuronal cortex. (B) Isolated fly brain with SPG cells labeled by nuclear DsRed  
425 expression driven by *SPG-Gal4*. Fluorescently marked cells like these from males  
426 and females were hand-isolated for RNA extraction. (C) Probes present (above  
427 background) in all male or female samples are displayed as normalized to the 75th  
428 percentile intensity of each array (19,218 probes). Each spot is the mean of 3  
429 samples from each condition. Black spots =differentially expressed genes (>2Fold,  
430 T-test p-value < 0.05, 284 probes). Red/orange=High expression, Yellow=Medium  
431 expression, Blue=Low expression. (D) Differentially expressed genes (>2 fold,T-test  
432 p-value < 0.05) in Male vs. Female are displayed as normalized to the median value  
433 of each probe across six samples (284 probes). The heat map color scale is shown on  
434 the right. (E) DHR3/Hr46) is preferentially expressed in males.

435

436 **Figure 2. Knockdown of DHR3/Hr46 in the BBB of mature males reduces**  
437 **courtship.** Graphs show the courtship index CI (fraction of time males spend  
438 courting during the observation period)  $\pm$  SEM (A, B), or the performance of males  
439 in a control activity assay (# of line crossings  $\pm$  SEM) (C) of the indicated genotypes.  
440 N= 20. Data were analyzed by ANOVA followed by Tukey multiple comparisons  
441 ( $p < 0.05$ ). Indices that are significantly different from the controls are marked by  
442 asterisks. *UAS-Hr46i* expression is restricted by the presence of *tubP-Gal80<sup>ts</sup>* at 18°C  
443 (induction -). Placement of 5-day-old males at 32°C for 16-24 hours (induction +)  
444 releases the Gal80 inhibition and leads to the expression of RNAi. (A) Expression of  
445 two different *UAS-Hr46-RNAi* (1-line 27253 and 2-line 27254) using *SPG-Gal4*

446 significantly reduces male courtship. B) Conditional expression of *UAS-Hr46i*  
447 (27254) using *Mdr-Gal4* in adult males similarly reduces courtship in comparison to  
448 controls. The controls are 1) *+Gal80<sup>ts</sup>;+SPG-Gal4* and *+Mdr-Gal4; +Gal80<sup>ts</sup>*,  
449 respectively and 2) *+; +UAS-Hr46 RNAi*. (C) The activity of the mutants as measured  
450 by number of line crossings is not lower than in control flies. *+Hr46<sup>(1)</sup>* control flies  
451 have reduced activity after induction that does not correlate with their courtship  
452 index. (D) *Mdr-Gal4* expression in SPG cells visualized by expression of *UAS-dsRed* in  
453 dissected brain (red). For comparison, *indy-GFP* (green) is expressed in both PG and  
454 SPG cells. (E) Blood–brain barrier integrity is not compromised in *Mdr-Gal4/ UAS-*  
455 *Hr46-RNAi* males. Flies were injected with 10 kDa TR-Dextran (red) and dye  
456 penetration into or exclusion from the brain was examined by confocal microscopy.  
457 The brain nuclei are stained with DAPI. A tight BBB is indicated by the demarcated  
458 red line on the surface of the brain indicating exclusion of TR-dextran from the brain  
459 of *Mdr-Gal4/ UAS-Hr46-RNAi* males.

460

461 **Figure 3. Hr46/DHR3 is required in the glial SPG cells for courtship.** Graphs  
462 show the courtship index CI (fraction of time males spend courting during the  
463 observation period)  $\pm$  SEM. N= 20. Data were analyzed by ANOVA followed by Tukey  
464 multiple comparisons ( $p < 0.05$ ). Indices that are significantly different from the  
465 controls are marked by asterisks. (A) Conditional glial knockdown of *DHR3/Hr46* in  
466 mature males using *repo-Gal4; Gal80<sup>ts</sup>* reduces courtship. (B) The courtship  
467 reduction of *Mdr-Gal4* directed *DHR3/Hr46* knockdown can be reversed by Gal80  
468 expression in glial cells directed by *repo-Gal80*.

469

470 **Figure 4. DHR3/Hr46 protein is located in SPG nuclei, and a reporter construct**  
471 **indicates that the DHR3/Hr46 ligand is present in the SPG cells of mature**  
472 **males.**

473 (A-D) Anti-DHR3 antibody staining (Red) shows the presence of DHR3 in the nuclei  
474 and cytoplasm of SPG cells. Indy-GFP (green) marks BBB cells. Blue: DNA staining  
475 (DAPI). (E-G) Activation of the *hs-Gal4<sup>LBD</sup> DHR3* reporter (25) indicates the presence  
476 of the DHR3/Hr46 ligand in SPG cells. *hs-Gal4<sup>LBD</sup> DHR3/UAS-dsRed/indy-GFP* mature  
477 males were heat-shocked to express *Gal4<sup>LBD</sup> DHR3*. Following binding of DHR3 ligand,  
478 Gal4 initiates transcription at *UAS-dsRed(nuclear)*. dsRed can be seen expressed in  
479 the characteristic large nuclei of SPG cells (red). *Indy-GFP* expression is used as a  
480 BBB marker (green). Blue: DNA staining (DAPI, blue).

481

482 **S1 Table. Differentially expressed genes in BBB from males vs. females**  
483 **(>2Fold, p<0.05).** 284 transcripts were identified that differ by >2Fold (p<0.05). Of  
484 those 112 were male-preferentially expressed, 172 were female-preferentially  
485 expressed.

486

487 **S2 Table. Gene Ontology classifications of the 284 genes differentially**  
488 **expressed in BBB Males vs. Females.**

489

490 **Acknowledgements**

491 We thank Dr. Carl Thummel for anti-DHR3 antibodies and fly lines and Takeshi  
492 Awasaki (University of Massachusetts), Rob Jackson (Tufts University), Christian  
493 Klämbt (University of Münster) and Gregg Roman (University of Mississippi) for fly  
494 lines. We thank Calvin Do for help with brain dissections. We thank GenUS  
495 biosystems for expert help with the microarray experiments.

496

## 497 **References**

- 498 1. Stork T, Engelen D, Krudewig A, Silies M, Bainton RJ, Klambt C. Organization  
499 and function of the blood-brain barrier in *Drosophila*. *J Neurosci*. 2008;28(3):587-97.
- 500 2. Schirmeier S, Klambt C. The *Drosophila* blood-brain barrier as interface  
501 between neurons and hemolymph. *Mech Dev*. 2015.
- 502 3. Hindle SJ, Bainton RJ. Barrier mechanisms in the *Drosophila* blood-brain  
503 barrier. *Front Neurosci*. 2014;8:414.
- 504 4. Limmer S, Weiler A, Volkenhoff A, Babatz F, Klambt C. The *Drosophila* blood-  
505 brain barrier: development and function of a glial endothelium. *Front Neurosci*.  
506 2014;8:365.
- 507 5. DeSalvo MK, Hindle SJ, Rusan ZM, Orng S, Eddison M, Halliwill K, et al. The  
508 *Drosophila* surface glia transcriptome: evolutionary conserved blood-brain barrier  
509 processes. *Front Neurosci*. 2014;8:346.
- 510 6. Bainton RJ, Tsai LT, Schwabe T, DeSalvo M, Gaul U, Heberlein U. moody  
511 encodes two GPCRs that regulate cocaine behaviors and blood-brain barrier  
512 permeability in *Drosophila*. *Cell*. 2005;123(1):145-56.

- 513 7. Schwabe T, Bainton RJ, Fetter RD, Heberlein U, Gaul U. GPCR signaling is  
514 required for blood-brain barrier formation in drosophila. *Cell*. 2005;123(1):133-44.
- 515 8. Hoxha V, Lama C, Chang PL, Saurabh S, Patel N, Olate N, et al. Sex-specific  
516 signaling in the blood-brain barrier is required for male courtship in *Drosophila*. *PLoS*  
517 *genetics*. 2013;9(1):e1003217.
- 518 9. Lazareva AA, Roman G, Mattox W, Hardin PE, Dauwalder B. A role for the adult  
519 fat body in *Drosophila* male courtship behavior. *PLoS genetics*. 2007;3(1):e16.
- 520 10. Lam G, Hall BL, Bender M, Thummel CS. DHR3 is required for the prepupal-  
521 pupal transition and differentiation of adult structures during *Drosophila*  
522 metamorphosis. *Developmental biology*. 1999;212(1):204-16.
- 523 11. Lam GT, Jiang C, Thummel CS. Coordination of larval and prepupal gene  
524 expression by the DHR3 orphan receptor during *Drosophila* metamorphosis.  
525 *Development*. 1997;124(9):1757-69.
- 526 12. Ruaud AF, Lam G, Thummel CS. The *Drosophila* nuclear receptors DHR3 and  
527 betaFTZ-F1 control overlapping developmental responses in late embryos.  
528 *Development*. 2010;137(1):123-31.
- 529 13. Brand AH, Perrimon N. Targeted gene expression as a means of altering cell  
530 fates and generating dominant phenotypes. *Development*. 1993;118(2):401-15.
- 531 14. Baker BS, Wolfner MF. A molecular analysis of doublesex, a bifunctional gene  
532 that controls both male and female sexual differentiation in *Drosophila melanogaster*.  
533 *Genes & development*. 1988;2(4):477-89.
- 534 15. Greenspan RJ. Understanding the genetic construction of behavior. *Sci Am*.  
535 1995;272(4):72-8.



- 536 16. Hall JC. The mating of a fly. *Science*. 1994;264(5166):1702-14.
- 537 17. Vilella A, Hall JC. Neurogenetics of courtship and mating in *Drosophila*. *Adv*  
538 *Genet*. 2008;62:67-184.
- 539 18. Taylor BJ, Vilella A, Ryner LC, Baker BS, Hall JC. Behavioral and  
540 neurobiological implications of sex-determining factors in *Drosophila*. *Dev Genet*.  
541 1994;15(3):275-96.
- 542 19. McGuire SE, Roman G, Davis RL. Gene expression systems in *Drosophila*: a  
543 synthesis of time and space. *Trends Genet*. 2004;20(8):384-91.
- 544 20. Kanai MI, Kim MJ, Akiyama T, Takemura M, Wharton K, O'Connor MB, et al.  
545 Regulation of neuroblast proliferation by surface glia in the *Drosophila* larval brain.  
546 *Sci Rep*. 2018;8(1):3730.
- 547 21. Mayer F, Mayer N, Chinn L, Pinsonneault RL, Kroetz D, Bainton RJ.  
548 Evolutionary conservation of vertebrate blood-brain barrier chemoprotective  
549 mechanisms in *Drosophila*. *J Neurosci*. 2009;29(11):3538-50.
- 550 22. Anand A, Vilella A, Ryner LC, Carlo T, Goodwin SF, Song HJ, et al. Molecular  
551 Genetic Dissection of the Sex-Specific and Vital Functions of the *Drosophila*  
552 *melanogaster* Sex Determination Gene *fruitless*. *Genetics*. 2001;158(4):1569-95.
- 553 23. Awasaki T, Lai SL, Ito K, Lee T. Organization and postembryonic development  
554 of glial cells in the adult central brain of *Drosophila*. *J Neurosci*. 2008;28(51):13742-  
555 53.
- 556 24. Unhavaithaya Y, Orr-Weaver TL. Polyploidization of glia in neural  
557 development links tissue growth to blood-brain barrier integrity. *Genes &*  
558 *development*. 2012;26(1):31-6.

- 559 25. Palanker L, Necakov AS, Sampson HM, Ni R, Hu C, Thummel CS, et al. Dynamic  
560 regulation of *Drosophila* nuclear receptor activity in vivo. *Development*.  
561 2006;133(18):3549-62.
- 562 26. Ferveur JF, Greenspan RJ. Courtship behavior of brain mosaics in *Drosophila*.  
563 *J Neurogenet*. 1998;12(4):205-26.
- 564 27. Baker BS. Sex in flies: the splice of life. *Nature*. 1989;340(6234):521-4.
- 565 28. Dauwalder B. The roles of fruitless and doublesex in the control of male  
566 courtship. *Int Rev Neurobiol*. 2011;99:87-105.
- 567 29. Horner MA, Pardee K, Liu S, King-Jones K, Lajoie G, Edwards A, et al. The  
568 *Drosophila* DHR96 nuclear receptor binds cholesterol and regulates cholesterol  
569 homeostasis. *Genes & development*. 2009;23(23):2711-6.
- 570 30. Carney GE, Wade AA, Sapra R, Goldstein ES, Bender M. DHR3, an ecdysone-  
571 inducible early-late gene encoding a *Drosophila* nuclear receptor, is required for  
572 embryogenesis. *Proceedings of the National Academy of Sciences of the United States*  
573 *of America*. 1997;94(22):12024-9.
- 574 31. Sullivan AA, Thummel CS. Temporal profiles of nuclear receptor gene  
575 expression reveal coordinate transcriptional responses during *Drosophila*  
576 development. *Mol Endocrinol*. 2003;17(11):2125-37.
- 577 32. Hindle SJ, Munji RN, Dolgih E, Gaskins G, Orng S, Ishimoto H, et al.  
578 Evolutionarily Conserved Roles for Blood-Brain Barrier Xenobiotic Transporters in  
579 Endogenous Steroid Partitioning and Behavior. *Cell Rep*. 2017;21(5):1304-16.

- 580 33. Montagne J, Lecerf C, Parvy JP, Bennion JM, Radimerski T, Ruhf ML, et al. The  
581 nuclear receptor DHR3 modulates dS6 kinase-dependent growth in *Drosophila*. *PLoS*  
582 *genetics*. 2010;6(5):e1000937.
- 583 34. Dauwalder B, Tsujimoto S, Moss J, Mattox W. The *Drosophila* takeout gene is  
584 regulated by the somatic sex-determination pathway and affects male courtship  
585 behavior. *Genes & development*. 2002;16(22):2879-92.
- 586 35. Li Y, Hoxha V, Lama C, Dinh BH, Vo CN, Dauwalder B. The hector G-protein  
587 coupled receptor is required in a subset of fruitless neurons for male courtship  
588 behavior. *PloS one*. 2011;6(11):e28269.
- 589 36. Love CR, Dauwalder B. *Drosophila* as a Model to Study the Blood-Brain Barrier.  
590 In: Barichello T, editor. *Blood-Brain Barrier*. New York, NY: Springer New York; 2019.  
591 p. 175-85.
- 592 37. Daneman R, Barres BA. The blood-brain barrier--lessons from moody flies. *Cell*.  
593 2005;123(1):9-12.

594

Fig 1

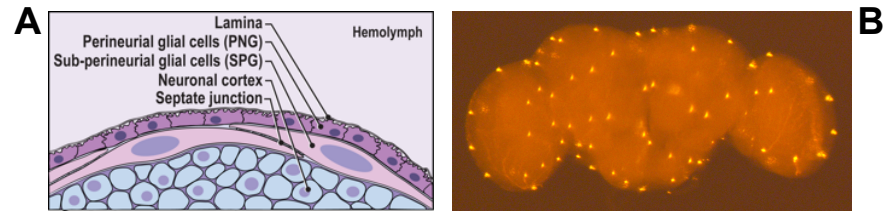

M. de la Flor, modified from Daneman and Barres (2005)

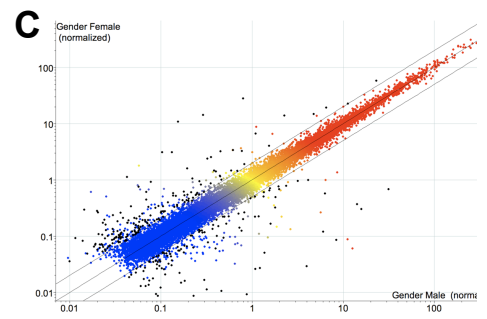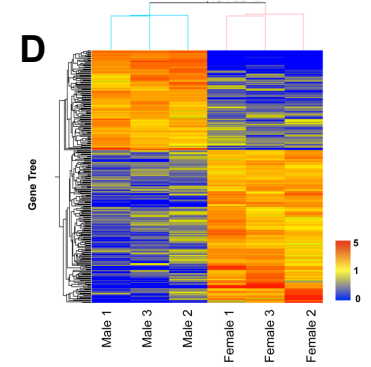

**E**

| Ratio | P-value  | Expression profile |        | GeneName                    |
|-------|----------|--------------------|--------|-----------------------------|
|       |          | male               | female |                             |
| 0.46  | 3.69E-03 |                    |        | Hormone receptor-like in 46 |

Fig 2

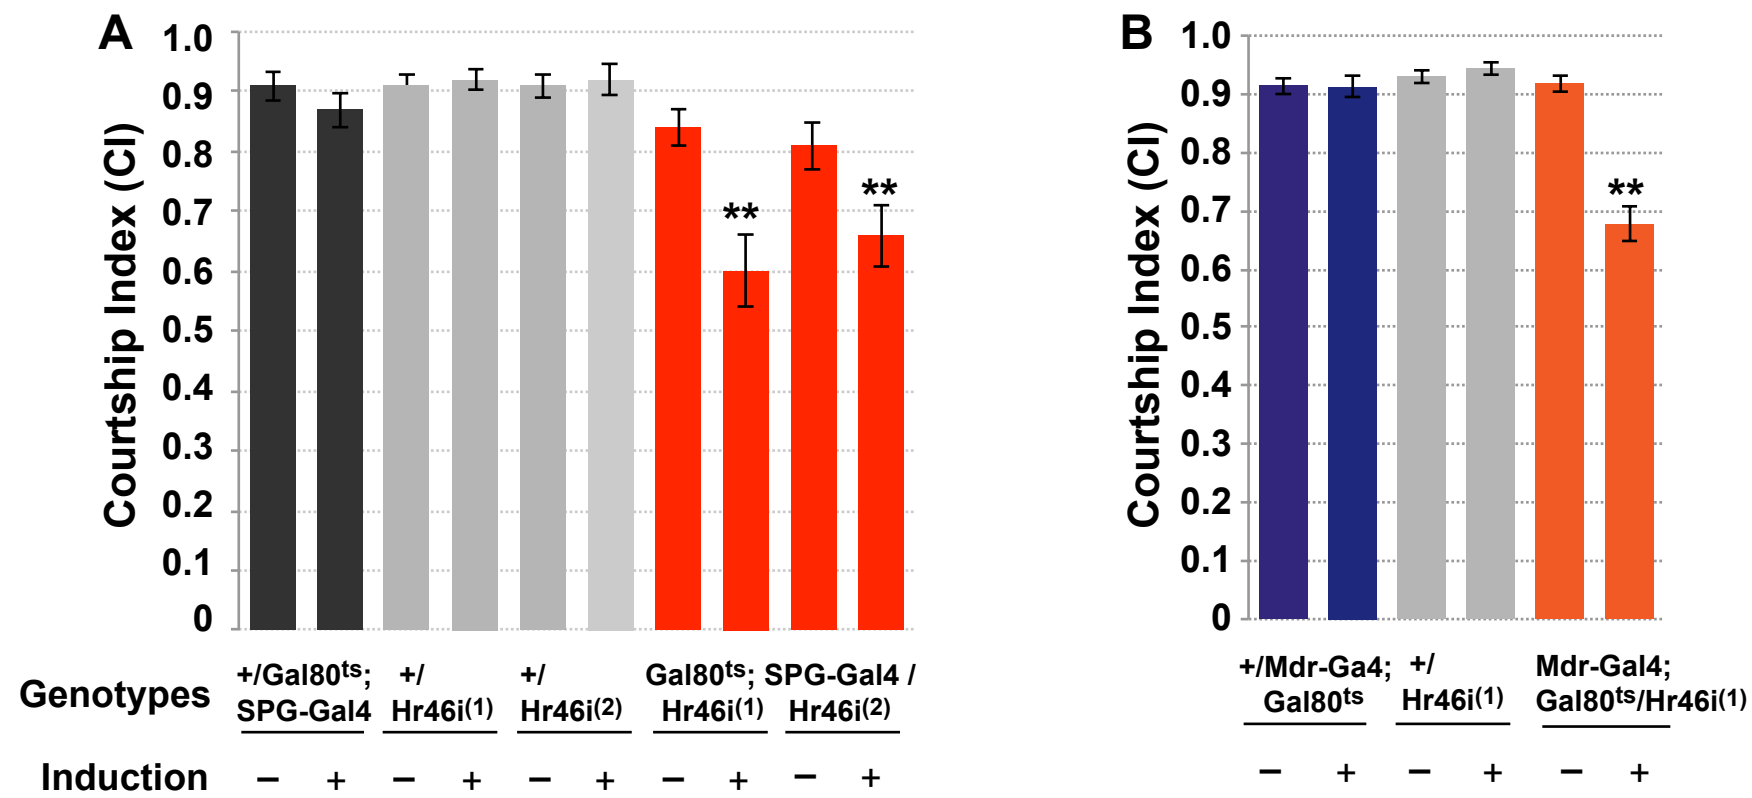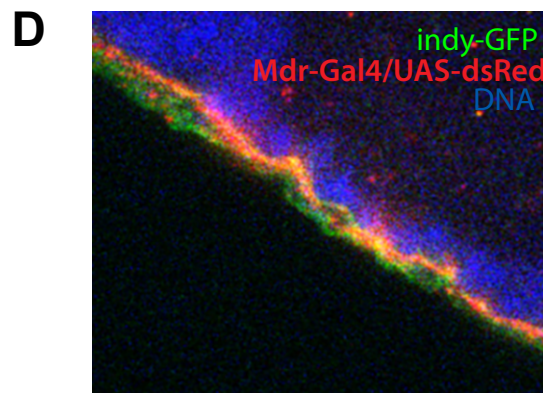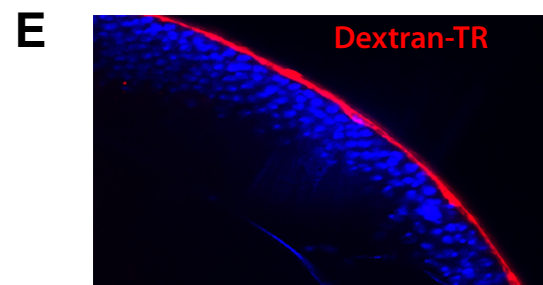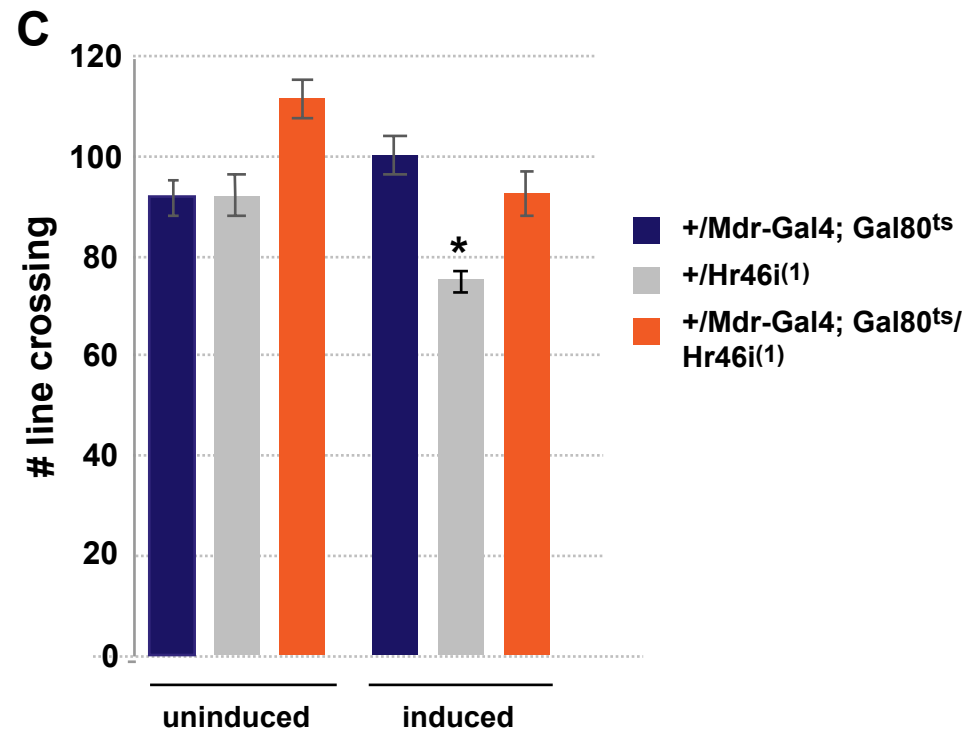

Fig 3

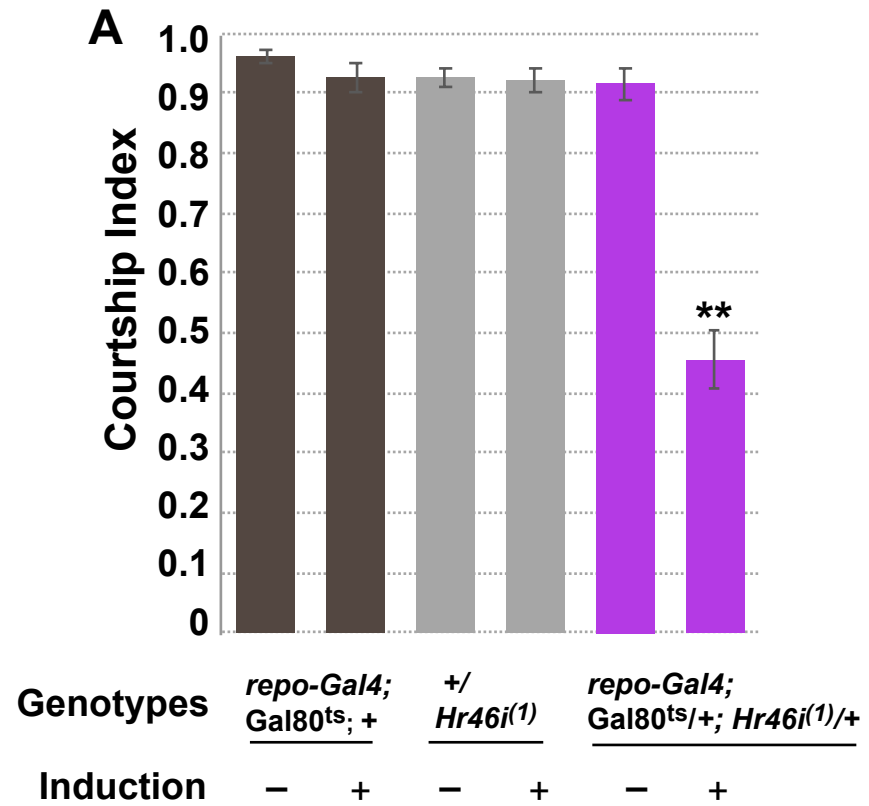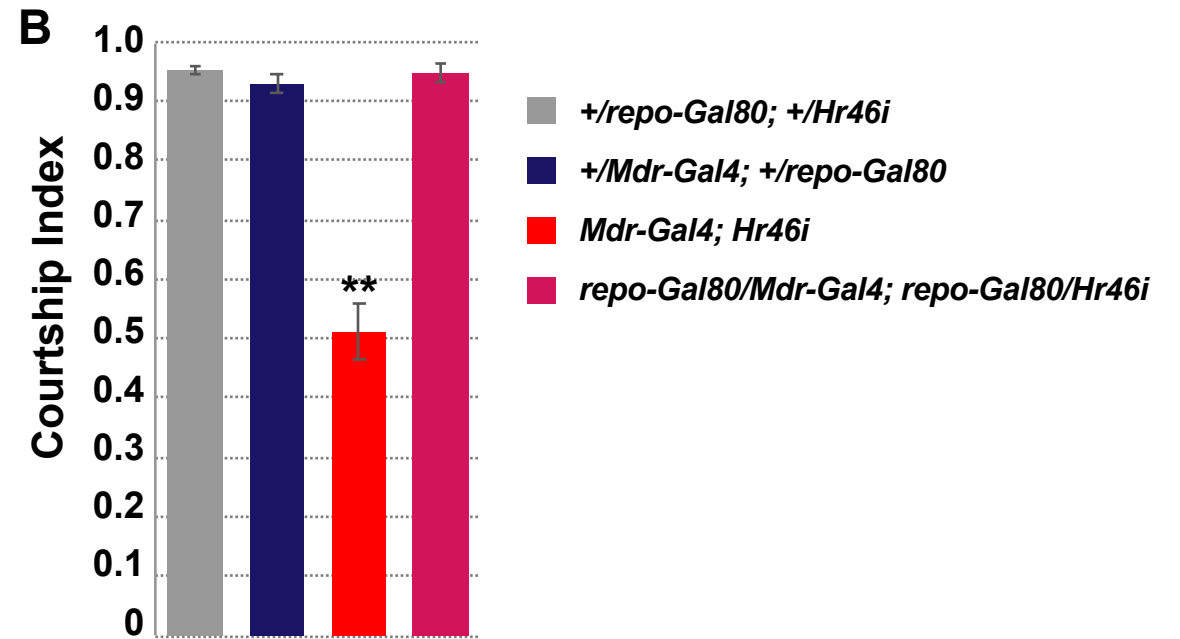

Fig. 4

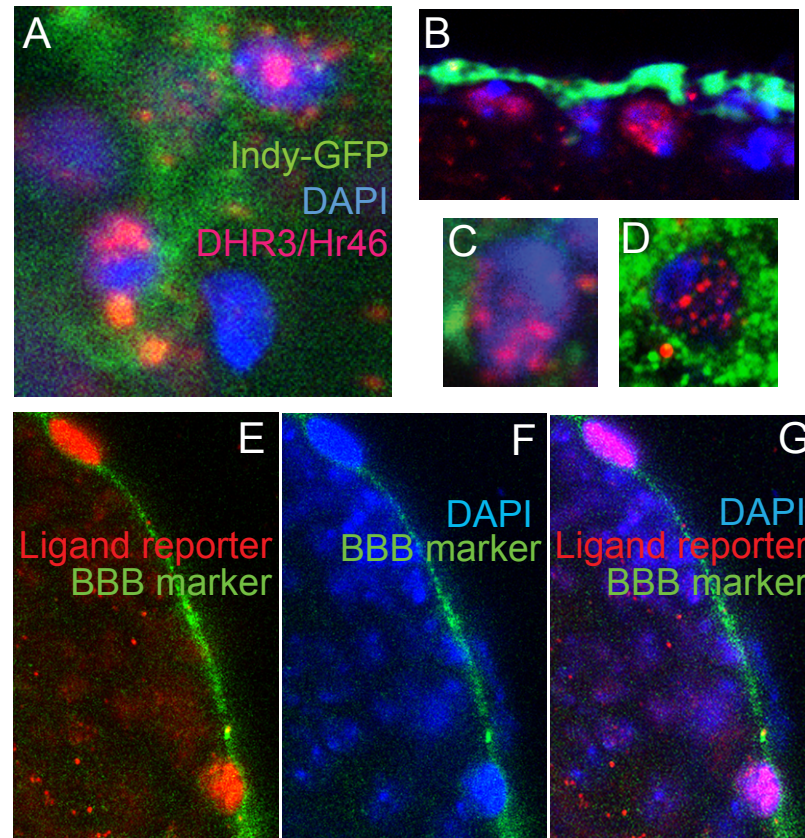

### Differentially expressed genes in BBB from males vs. females (>2Fold, p<0.05, 284 probes)

Intensity values are normalized to the 75th percentile intensity of each array.

p-values are based on a Welch T-test.

| Systematic   | GeneSymbol  | PrimaryAccession | UniGeneID   | GO          | 1    | 2    | 3    | 4      | 5      | 6      | Ratio | P-value  |
|--------------|-------------|------------------|-------------|-------------|------|------|------|--------|--------|--------|-------|----------|
|              |             |                  |             |             | Male | Male | Male | Female | Female | Female |       |          |
| A_09_P010076 | Yp1         | FBtr0071419      | FBgn0004045 | GO:0003824( | 0.06 | 0.19 | 0.22 | 10.56  | 3.03   | 18.99  | 64.58 | 4.03E-03 |
| A_09_P010081 | Yp3         | FBtr0073821      | FBgn0004047 | GO:0003824( | 0.09 | 0.20 | 0.57 | 12.21  | 4.12   | 26.93  | 50.84 | 6.60E-03 |
| A_09_P011441 | Yp2         | FBtr0071424      | FBgn0005391 | GO:0003824( | 0.42 | 0.56 | 1.38 | 24.59  | 8.79   | 51.77  | 32.48 | 6.53E-03 |
| A_09_P033016 | Chc2        | FBtr0072795      | FBgn0022702 | GO:0004568( | 0.08 | 0.12 | 0.11 | 4.38   | 2.06   | 2.90   | 29.31 | 2.27E-04 |
| A_09_P040561 | CG14222     | FBtr0074763      | FBgn0031043 | GO:0008080( | 0.01 | 0.02 | 0.02 | 0.26   | 0.33   | 0.30   | 23.02 | 1.57E-03 |
| A_09_P041791 | Cp36        | FBtr0071203      | FBgn0000359 | GO:0005213( | 0.05 | 0.06 | 0.02 | 0.20   | 2.71   | 0.47   | 16.77 | 4.65E-02 |
| A_09_P046876 |             | IP02754          | Dm.4788     |             | 0.07 | 0.26 | 0.06 | 0.78   | 7.80   | 0.74   | 15.62 | 4.91E-02 |
| A_09_P047621 | Cp7Fb       | FBtr0071201      | FBgn0014465 | GO:0016491( | 0.03 | 0.01 | 0.02 | 0.22   | 0.29   | 0.28   | 14.77 | 4.53E-03 |
| A_09_P017246 | Ste:CG33238 | FBtr0300087      | FBgn0053238 | GO:0005634( | 0.01 | 0.03 | 0.01 | 0.43   | 0.16   | 0.25   | 14.44 | 1.21E-03 |
| A_09_P030341 | Cp7Fb       | FBtr0071201      | FBgn0014465 | GO:0016491( | 0.06 | 0.06 | 0.04 | 0.79   | 0.73   | 0.74   | 13.56 | 4.65E-07 |
| A_09_P017282 | Ste:CG33246 | FBtr0300095      | FBgn0053246 | GO:0005634( | 0.06 | 0.09 | 0.08 | 1.29   | 0.59   | 0.89   | 11.61 | 1.15E-03 |
| A_09_P029356 | dhd         | FBtr0070749      | FBgn0011761 | GO:0005634( | 0.05 | 0.36 | 0.17 | 1.02   | 2.62   | 1.20   | 10.13 | 3.45E-02 |
| A_09_P166400 |             | TC241037         |             |             | 0.08 | 0.11 | 0.01 | 0.30   | 1.18   | 0.35   | 9.95  | 3.19E-02 |
| A_09_P041771 | Cp15        | FBtr0076572      | FBgn0000355 | GO:0005213( | 0.01 | 0.08 | 0.02 | 0.26   | 0.44   | 0.08   | 9.61  | 4.68E-02 |
| A_09_P061401 | Jon99Fi     | FBtr0085652      | FBgn0039778 | GO:0004252( | 0.00 | 0.00 | 0.02 | 0.11   | 0.03   | 0.14   | 9.37  | 3.58E-02 |
| A_09_P017256 | Ste:CG33240 | FBtr0300089      | FBgn0053240 | GO:0005956( | 0.02 | 0.03 | 0.01 | 0.27   | 0.13   | 0.18   | 8.52  | 1.74E-03 |
| A_09_P042086 | dsx         | FBtr0081760      | FBgn0000504 | GO:0000122( | 0.03 | 0.03 | 0.03 | 0.25   | 0.19   | 0.27   | 7.91  | 2.26E-05 |
| A_09_P031461 | pgc         | FBtr0112520      | FBgn0016053 | GO:0007277( | 0.01 | 0.03 | 0.03 | 0.11   | 0.30   | 0.11   | 7.73  | 6.25E-03 |
| A_09_P119000 | CycB        | FBtr0071911      | FBgn0000405 | GO:0000086( | 0.02 | 0.07 | 0.01 | 0.18   | 0.25   | 0.12   | 7.63  | 3.00E-02 |
| A_09_P198615 | Hsp70Aa     | FBtr0082512      | FBgn0013275 | GO:0001666( | 0.41 | 0.68 | 0.25 | 2.00   | 2.39   | 5.36   | 7.15  | 7.58E-03 |
| A_09_P017276 |             | TC239464         |             | GO:0005634( | 0.26 | 0.40 | 0.30 | 3.68   | 1.41   | 2.13   | 7.05  | 6.84E-03 |
| A_09_P029571 | Hsp70Aa     | FBtr0082512      | FBgn0013275 | GO:0001666( | 0.92 | 1.81 | 0.54 | 5.62   | 5.47   | 9.03   | 6.77  | 1.59E-02 |
| A_09_P063611 |             | LP04080          | Dm.11995    |             | 0.01 | 0.04 | 0.07 | 0.17   | 0.19   | 0.27   | 6.73  | 3.90E-02 |
| A_09_P041786 | Cp19        | FBtr0076573      | FBgn0000358 | GO:0005213( | 0.05 | 0.05 | 0.04 | 0.16   | 0.53   | 0.32   | 6.49  | 1.73E-02 |
| A_09_P029581 | Hsp70Bb     | FBtr0082637      | FBgn0013278 | GO:0001666( | 0.34 | 0.44 | 0.28 | 1.52   | 1.37   | 4.72   | 6.21  | 3.06E-02 |
| A_09_P041876 | CycB        | FBtr0071911      | FBgn0000405 | GO:0000086( | 0.04 | 0.09 | 0.07 | 0.18   | 0.61   | 0.57   | 5.95  | 2.66E-02 |
| A_09_P218800 |             | LD23983          | Dm.2955     |             | 0.02 | 0.04 | 0.02 | 0.08   | 0.29   | 0.10   | 5.94  | 1.90E-02 |
| A_09_P059675 | Hsp70Bbb    | FBtr0082636      | FBgn0051354 | GO:0001666( | 2.34 | 2.95 | 1.43 | 9.55   | 9.25   | 23.23  | 5.92  | 8.96E-03 |
| A_09_P108115 | Arpc3B      | FBtr0113478      | FBgn0065032 | GO:0003779( | 0.01 | 0.02 | 0.01 | 0.08   | 0.05   | 0.12   | 5.82  | 9.69E-03 |
| A_09_P041776 | Cp16        | FBtr0076574      | FBgn0000356 | GO:0005213( | 0.02 | 0.01 | 0.04 | 0.09   | 0.15   | 0.14   | 5.68  | 3.67E-03 |
| A_09_P113130 | CG14075     | FBtr0075024      | FBgn0036835 |             | 0.63 | 0.72 | 0.50 | 3.98   | 3.05   | 3.13   | 5.53  | 2.48E-06 |
| A_09_P176625 |             | CO186850         | Dm.33307    |             | 0.03 | 0.02 | 0.02 | 0.13   | 0.09   | 0.10   | 5.33  | 1.73E-03 |
| A_09_P171040 |             |                  |             |             | 0.01 | 0.04 | 0.02 | 0.14   | 0.07   | 0.10   | 5.05  | 6.82E-03 |
| A_09_P119565 | dsx         | FBtr0081760      | FBgn0000504 | GO:0000122( | 0.03 | 0.07 | 0.02 | 0.22   | 0.18   | 0.17   | 4.88  | 1.63E-02 |
| A_09_P148580 | CHES-I-like | FBtr0071079      | FBgn0029504 | GO:0003700( | 0.25 | 0.22 | 0.19 | 1.20   | 1.04   | 0.93   | 4.81  | 3.63E-08 |
| A_09_P055091 | Muc68D      | FBtr0076119      | FBgn0036203 | GO:0005576( | 0.01 | 0.05 | 0.01 | 0.06   | 0.07   | 0.14   | 4.81  | 4.37E-02 |
| A_09_P149325 |             | TC256165         |             | GO:0002119( | 0.08 | 0.06 | 0.02 | 0.20   | 0.23   | 0.19   | 4.71  | 4.97E-02 |
| A_09_P067431 | CG4020      | FBtr0070824      | FBgn0029821 | GO:0005488( | 0.11 | 0.21 | 0.08 | 0.48   | 0.63   | 0.64   | 4.64  | 1.62E-02 |
| A_09_P030336 | Cp7Fa       | FBtr0100003      | FBgn0014464 | GO:0003674( | 0.07 | 0.07 | 0.08 | 0.36   | 0.34   | 0.29   | 4.57  | 3.33E-08 |
| A_09_P021206 | CG17633     | NM_135466        | Dm.7694     | GO:0004181( | 0.02 | 0.05 | 0.01 | 0.16   | 0.05   | 0.19   | 4.51  | 3.97E-02 |
| A_09_P134245 | ovo         | FBtr0070738      | FBgn0003028 | GO:0000122( | 0.08 | 0.16 | 0.04 | 0.33   | 0.29   | 0.41   | 4.28  | 4.71E-02 |
| A_09_P112275 | CG4020      | FBtr0070824      | FBgn0029821 | GO:0005488( | 0.09 | 0.22 | 0.09 | 0.47   | 0.56   | 0.55   | 4.26  | 2.43E-02 |
| A_09_P043951 | osk         | FBtr0081954      | FBgn0003015 | GO:0007277( | 0.03 | 0.06 | 0.04 | 0.14   | 0.24   | 0.13   | 4.20  | 1.63E-03 |
| A_09_P034456 | CG14075     | FBtr0075024      | FBgn0036835 |             | 0.72 | 0.87 | 0.71 | 4.15   | 2.41   | 3.26   | 4.19  | 1.71E-03 |
| A_09_P212665 |             | Bl631263         | Dm.6890     |             | 0.03 | 0.06 | 0.02 | 0.15   | 0.10   | 0.12   | 4.18  | 9.97E-03 |
| A_09_P042706 | hfw         | FBtr0070270      | FBgn0001189 | GO:0005575( | 0.06 | 0.06 | 0.06 | 0.26   | 0.28   | 0.21   | 4.07  | 5.03E-07 |
| A_09_P040936 | r-cup       | FBtr0077269      | FBgn0031142 | GO:0005488( | 0.02 | 0.01 | 0.03 | 0.07   | 0.08   | 0.06   | 4.05  | 7.35E-04 |
| A_09_P054086 | CG5804      | FBtr0076591      | FBgn0035926 | GO:0000062( | 0.03 | 0.09 | 0.05 | 0.21   | 0.14   | 0.33   | 4.05  | 2.13E-02 |
| A_09_P078091 | CG6133      | FBtr0070669      | FBgn0026079 | GO:0003723( | 0.04 | 0.10 | 0.12 | 0.36   | 0.28   | 0.32   | 3.97  | 2.03E-02 |
| A_09_P010936 | yl          | FBtr0073897      | FBgn0004649 | GO:0005509( | 0.03 | 0.07 | 0.05 | 0.14   | 0.35   | 0.15   | 3.95  | 1.68E-02 |



| Systematic   | GeneSymbol   | PrimaryAccession | UniGeneID   | GO          | norm | norm | norm | norm  | norm  | norm  | Ratio | P-value  |
|--------------|--------------|------------------|-------------|-------------|------|------|------|-------|-------|-------|-------|----------|
| A_09_PI90865 |              | TC242599         |             |             | 0.02 | 0.03 | 0.02 | 0.11  | 0.09  | 0.10  | 3.94  | 8.12E-03 |
| A_09_P030346 | Cp7Fc        | FBr0071202       | FBgn0014466 |             | 0.05 | 0.05 | 0.03 | 0.18  | 0.22  | 0.11  | 3.91  | 3.03E-03 |
| A_09_P078056 | Mipp2        | FBr0070884       | FBgn0026060 | GO:0003993( | 0.12 | 0.12 | 0.30 | 0.53  | 0.55  | 0.79  | 3.82  | 3.14E-02 |
| A_09_P075131 | CG3509       | FBr0082969       | FBgn0038252 | GO:0000786( | 0.03 | 0.04 | 0.02 | 0.07  | 0.21  | 0.08  | 3.79  | 2.89E-02 |
| A_09_P077971 | CG2652       | FBr0070505       | FBgn0025838 | GO:0005634( | 0.23 | 0.60 | 0.37 | 1.47  | 1.11  | 1.65  | 3.77  | 2.47E-02 |
| A_09_P002691 | CG17672      | FBr0110982       | FBgn0083978 | GO:0003735( | 0.36 | 0.41 | 0.37 | 1.23  | 1.15  | 2.05  | 3.75  | 1.59E-04 |
| A_09_PI68703 |              | TC237125         |             |             | 0.25 | 0.26 | 0.28 | 0.93  | 0.92  | 0.99  | 3.61  | 4.61E-06 |
| A_09_P043966 | otu          | FBr0071238       | FBgn0003023 | GO:0003676( | 0.03 | 0.02 | 0.03 | 0.09  | 0.16  | 0.07  | 3.61  | 1.02E-02 |
| A_09_PI78935 |              | TC249774         |             |             | 0.01 | 0.02 | 0.02 | 0.09  | 0.04  | 0.06  | 3.58  | 7.48E-03 |
| A_09_PI69159 |              | TC242617         |             |             | 0.01 | 0.02 | 0.02 | 0.06  | 0.04  | 0.05  | 3.52  | 8.39E-03 |
| A_09_P040376 | Mec2         | FBr0074669       | FBgn0030993 | GO:0016020( | 0.01 | 0.05 | 0.02 | 0.10  | 0.07  | 0.08  | 3.49  | 4.36E-02 |
| A_09_PI80690 |              | TC237960         |             |             | 0.14 | 0.17 | 0.13 | 0.71  | 0.34  | 0.51  | 3.46  | 1.16E-02 |
| A_09_P019306 | lr25a        | FBr0289979       | FBgn0031634 | GO:0004970( | 0.01 | 0.01 | 0.01 | 0.03  | 0.02  | 0.06  | 3.43  | 2.73E-02 |
| A_09_P070536 | CG6733       | FBr0084352       | FBgn0039052 | GO:0004046( | 0.01 | 0.04 | 0.01 | 0.06  | 0.05  | 0.06  | 3.40  | 2.82E-02 |
| A_09_P204080 |              | TC248381         |             |             | 0.01 | 0.05 | 0.03 | 0.12  | 0.08  | 0.09  | 3.40  | 4.72E-02 |
| A_09_P065356 | CG7916       | FBr0080549       | FBgn0028534 |             | 0.02 | 0.02 | 0.02 | 0.09  | 0.03  | 0.09  | 3.39  | 2.66E-02 |
| A_09_PI23280 |              | GH08205          | Dm.5529     |             | 0.03 | 0.06 | 0.01 | 0.07  | 0.12  | 0.09  | 3.39  | 3.03E-02 |
| A_09_P078881 | XRCCI        | FBr0070763       | FBgn0026751 | GO:0000012( | 0.13 | 0.13 | 0.10 | 0.43  | 0.41  | 0.35  | 3.37  | 5.93E-06 |
| A_09_P203785 |              | TC253114         |             |             | 0.01 | 0.01 | 0.04 | 0.10  | 0.04  | 0.07  | 3.35  | 4.11E-02 |
| A_09_PI30245 | CG32755      | FBr0070862       | FBgn0052755 | GO:0004252( | 0.03 | 0.02 | 0.01 | 0.06  | 0.07  | 0.08  | 3.34  | 2.33E-02 |
| A_09_PI74050 |              | CO180140         | Dm.32308    |             | 0.02 | 0.03 | 0.02 | 0.08  | 0.04  | 0.09  | 3.32  | 2.71E-02 |
| A_09_P009321 | CG18190      | FBr0273238       | FBgn0034403 | GO:0005875( | 0.03 | 0.07 | 0.06 | 0.10  | 0.28  | 0.12  | 3.25  | 3.55E-02 |
| A_09_P056706 | llp3         | FBr0076373       | FBgn0044050 | GO:0005158( | 3.49 | 4.47 | 6.18 | 16.94 | 12.99 | 14.85 | 3.24  | 3.80E-03 |
| A_09_P014066 | CG31904      | FBr0079501       | FBgn0260479 | GO:0005326( | 0.01 | 0.03 | 0.02 | 0.07  | 0.04  | 0.08  | 3.23  | 3.88E-02 |
| A_09_PI84695 |              |                  |             |             | 0.02 | 0.05 | 0.04 | 0.13  | 0.08  | 0.10  | 3.22  | 8.26E-03 |
| A_09_PI81000 |              | TC238156         |             |             | 0.11 | 0.11 | 0.09 | 0.45  | 0.30  | 0.28  | 3.21  | 2.10E-03 |
| A_09_P213545 |              | SD02447          | Dm.13899    |             | 0.06 | 0.08 | 0.03 | 0.25  | 0.13  | 0.15  | 3.16  | 1.03E-02 |
| A_09_P039541 | CG13008      | FBr0074323       | FBgn0030780 |             | 0.08 | 0.09 | 0.06 | 0.22  | 0.25  | 0.23  | 3.13  | 7.75E-05 |
| A_09_P038616 | CG11674      | FBr0073926       | FBgn0030551 | GO:0000398( | 0.04 | 0.04 | 0.02 | 0.08  | 0.18  | 0.09  | 3.12  | 1.43E-02 |
| A_09_P051371 | 5-ربيع الأول | FBr0070244       | FBgn0028550 | GO:0003700( | 0.04 | 0.02 | 0.03 | 0.08  | 0.10  | 0.10  | 3.12  | 2.70E-03 |
| A_09_P221105 |              |                  |             |             | 0.03 | 0.04 | 0.03 | 0.12  | 0.08  | 0.13  | 3.10  | 1.84E-03 |
| A_09_PI13000 | llp3         | FBr0076373       | FBgn0044050 | GO:0005158( | 4.33 | 5.69 | 9.34 | 21.05 | 14.60 | 22.26 | 3.10  | 1.40E-02 |
| A_09_P222415 | tlk          | FBr0299580       | FBgn0086899 | GO:0004672( | 0.31 | 0.24 | 0.27 | 0.91  | 0.71  | 0.87  | 3.04  | 1.77E-06 |
| A_09_PI88255 | CG12826      | FBr0088943       | FBgn0033207 |             | 0.04 | 0.04 | 0.05 | 0.14  | 0.16  | 0.07  | 3.04  | 1.97E-02 |
| A_09_PI49005 |              | TC236551         |             | GO:0004213( | 0.06 | 0.08 | 0.06 | 0.21  | 0.17  | 0.19  | 2.95  | 2.49E-04 |
| A_09_PI91550 | Lsd-2        | FBr0110969       | FBgn0030608 | GO:0005515( | 0.26 | 0.14 | 0.18 | 0.54  | 0.56  | 0.55  | 2.93  | 7.80E-03 |
| A_09_P207745 | up           | FBr0073853       | FBgn0004169 | GO:0005509( | 0.06 | 0.06 | 0.07 | 0.28  | 0.12  | 0.18  | 2.92  | 2.56E-02 |
| A_09_PI67837 |              | TC241479         |             |             | 0.03 | 0.04 | 0.04 | 0.10  | 0.08  | 0.15  | 2.91  | 9.37E-03 |
| A_09_PI70820 | ImpEI        | FBr0076606       | FBgn0001253 | GO:0003674( | 0.07 | 0.05 | 0.03 | 0.12  | 0.26  | 0.10  | 2.91  | 4.67E-02 |
| A_09_PI10435 | pgc          | FBr0112520       | FBgn0016053 | GO:0007277( | 0.04 | 0.04 | 0.02 | 0.11  | 0.13  | 0.07  | 2.90  | 7.13E-03 |
| A_09_PI86555 | CG15445      | FBr0077253       | FBgn0031161 |             | 0.20 | 0.20 | 0.23 | 0.57  | 0.62  | 0.62  | 2.83  | 1.75E-05 |
| A_09_P064396 | yellow-g     | FBr0072902       | FBgn0041709 | GO:0003674( | 0.03 | 0.07 | 0.06 | 0.12  | 0.19  | 0.14  | 2.81  | 1.22E-02 |
| A_09_P209795 | CG15308      | CO264762         | Dm.25253    |             | 0.03 | 0.04 | 0.03 | 0.06  | 0.07  | 0.13  | 2.80  | 1.94E-02 |
| A_09_P061806 | CG2003       | FBr0085871       | FBgn0039886 | GO:0005316( | 0.04 | 0.03 | 0.03 | 0.11  | 0.07  | 0.10  | 2.79  | 3.22E-03 |
| A_09_PI69610 |              | TC243008         |             |             | 0.03 | 0.02 | 0.03 | 0.06  | 0.05  | 0.08  | 2.79  | 2.15E-03 |
| A_09_P010301 | alphaTub67C  | FBr0076393       | FBgn0087040 | GO:0000280( | 0.15 | 0.19 | 0.20 | 0.34  | 0.82  | 0.43  | 2.77  | 3.91E-02 |
| A_09_PI97060 |              | AVV940284        | Dm.7880     |             | 0.05 | 0.10 | 0.05 | 0.21  | 0.12  | 0.21  | 2.76  | 1.81E-02 |
| A_09_P051331 |              | LD48059          |             |             | 0.99 | 1.75 | 1.84 | 4.51  | 2.99  | 4.72  | 2.71  | 1.17E-02 |
| A_09_P034446 | CG3819       | FBr0075048       | FBgn0036833 | GO:0003676( | 0.03 | 0.04 | 0.02 | 0.08  | 0.07  | 0.08  | 2.69  | 7.86E-03 |
| A_09_P077296 | Ant2         | FBr0073425       | FBgn0025111 | GO:0005471( | 0.41 | 0.43 | 0.48 | 1.05  | 1.04  | 1.49  | 2.69  | 6.14E-04 |
| A_09_P048456 |              | NP12807819       |             |             | 0.04 | 0.08 | 0.04 | 0.20  | 0.09  | 0.13  | 2.69  | 2.84E-02 |
| A_09_P224810 |              | TC257397         |             |             | 0.03 | 0.04 | 0.04 | 0.12  | 0.08  | 0.09  | 2.64  | 5.80E-04 |
| A_09_P226515 |              | LD10495          | Dm.1545     |             | 0.06 | 0.07 | 0.09 | 0.27  | 0.15  | 0.17  | 2.64  | 6.98E-03 |
| A_09_P012496 | mtrm         | FBr0076613       | FBgn0010431 | GO:0003674( | 0.09 | 0.12 | 0.10 | 0.21  | 0.40  | 0.21  | 2.64  | 2.44E-02 |
| A_09_P209100 |              | CO304209         | Dm.24222    |             | 0.11 | 0.11 | 0.09 | 0.24  | 0.34  | 0.25  | 2.63  | 2.79E-04 |

| Systematic   | GeneSymbol   | PrimaryAccession | UniGeneID   | GO          | 0.09  | 0.13  | 0.08  | 0.21  | 0.36  | 0.21  | Ratio | P-value  |
|--------------|--------------|------------------|-------------|-------------|-------|-------|-------|-------|-------|-------|-------|----------|
| A_09_P013416 | RnrS         | FBtr0088046      | FBgn0011704 | GO:0004748( | 0.09  | 0.13  | 0.08  | 0.21  | 0.36  | 0.21  | 2.62  | 8.54E-03 |
| A_09_P044156 | plu          | FBtr0086306      | FBgn0003114 | GO:0003677( | 0.03  | 0.05  | 0.04  | 0.11  | 0.10  | 0.07  | 2.60  | 2.97E-03 |
| A_09_P090090 | CR33963      | NR_002692        | Dm.4329     | GO:0003674( | 0.04  | 0.04  | 0.07  | 0.15  | 0.12  | 0.09  | 2.60  | 4.77E-03 |
| A_09_P042801 | Hsp27        | FBtr0076454      | FBgn0001226 | GO:0005875( | 0.40  | 0.53  | 0.40  | 0.83  | 1.28  | 1.37  | 2.58  | 4.75E-03 |
| A_09_P038581 | CG1368       | FBtr0073891      | FBgn0030539 | GO:0005213( | 0.03  | 0.04  | 0.04  | 0.12  | 0.08  | 0.08  | 2.56  | 1.58E-04 |
| A_09_P162875 |              | EC241822         | Dm.34635    |             | 0.11  | 0.11  | 0.10  | 0.26  | 0.30  | 0.26  | 2.55  | 5.63E-05 |
| A_09_P188290 |              | TC242105         |             |             | 0.16  | 0.14  | 0.21  | 0.42  | 0.56  | 0.34  | 2.54  | 2.52E-03 |
| A_09_P004446 | CG34437      | FBtr0112738      | FBgn0085466 |             | 0.03  | 0.04  | 0.03  | 0.10  | 0.08  | 0.09  | 2.54  | 5.20E-04 |
| A_09_P189675 | CG34417      | FBtr0112707      | FBgn0085446 | GO:0003779( | 0.13  | 0.12  | 0.08  | 0.33  | 0.19  | 0.31  | 2.54  | 8.66E-03 |
| A_09_P206870 | Hsp27        | FBtr0076454      | FBgn0001226 | GO:0005875( | 0.26  | 0.46  | 0.33  | 0.72  | 1.13  | 0.76  | 2.52  | 8.08E-03 |
| A_09_P184930 |              | TC244055         |             |             | 0.05  | 0.06  | 0.06  | 0.16  | 0.13  | 0.16  | 2.52  | 9.79E-05 |
| A_09_P180530 |              | TC235712         |             |             | 20.59 | 22.08 | 26.37 | 74.73 | 49.01 | 52.11 | 2.52  | 1.94E-03 |
| A_09_P153540 | Hml          | FBtr0075753      | FBgn0029167 | GO:0005529( | 0.09  | 0.17  | 0.19  | 0.47  | 0.30  | 0.33  | 2.51  | 2.83E-02 |
| A_09_P026966 | CG3906       | FBtr0072121      | FBgn0034871 |             | 0.01  | 0.03  | 0.02  | 0.04  | 0.05  | 0.08  | 2.49  | 1.82E-02 |
| A_09_P009566 | stg          | FBtr0085397      | FBgn0003525 | GO:0000086( | 0.02  | 0.02  | 0.03  | 0.08  | 0.06  | 0.07  | 2.49  | 3.57E-03 |
| A_09_P194885 | Hsp27        | FBtr0076454      | FBgn0001226 | GO:0005875( | 0.45  | 0.68  | 0.63  | 1.04  | 1.60  | 1.74  | 2.47  | 6.35E-03 |
| A_09_P060721 | CG14523      | FBtr0085349      | FBgn0039612 | GO:0004222( | 0.04  | 0.08  | 0.04  | 0.14  | 0.10  | 0.12  | 2.47  | 1.77E-02 |
| A_09_P067096 | CG2861       | FBtr0070731      | FBgn0029728 |             | 0.03  | 0.03  | 0.03  | 0.08  | 0.07  | 0.06  | 2.47  | 4.88E-03 |
| A_09_P067446 | CG3011       | FBtr0070827      | FBgn0029823 | GO:0004372( | 0.52  | 1.24  | 0.70  | 1.93  | 1.48  | 2.35  | 2.46  | 4.28E-02 |
| A_09_P017711 | Cyp6t1       | FBtr0077212      | FBgn0031182 | GO:0004497( | 0.04  | 0.05  | 0.08  | 0.14  | 0.13  | 0.14  | 2.46  | 3.06E-02 |
| A_09_P111075 | CG30345      | FBtr0305317      | FBgn0050345 | GO:0005215( | 0.03  | 0.05  | 0.04  | 0.15  | 0.07  | 0.10  | 2.46  | 1.83E-02 |
| A_09_P205005 | Lsd-2        | FBtr0110969      | FBgn0030608 | GO:0005515( | 0.35  | 0.18  | 0.21  | 0.57  | 0.68  | 0.52  | 2.45  | 1.97E-02 |
| A_09_P071556 | CG11878      | FBtr0084821      | FBgn0039310 |             | 0.04  | 0.07  | 0.05  | 0.14  | 0.15  | 0.09  | 2.44  | 8.59E-03 |
| A_09_P210930 | CG13056      | FBtr0075376      | FBgn0040794 |             | 0.09  | 0.14  | 0.22  | 0.26  | 0.33  | 0.44  | 2.43  | 4.89E-02 |
| A_09_P196605 | Osi7         | FBtr0078597      | FBgn0037414 |             | 0.02  | 0.03  | 0.05  | 0.11  | 0.05  | 0.08  | 2.41  | 1.95E-02 |
| A_09_P198270 |              | NP027442         |             |             | 0.08  | 0.07  | 0.04  | 0.12  | 0.14  | 0.21  | 2.40  | 9.45E-03 |
| A_09_P167565 |              | SD02447          | Dm.13899    |             | 0.06  | 0.08  | 0.07  | 0.23  | 0.12  | 0.17  | 2.40  | 9.42E-03 |
| A_09_P012081 | Myo61F       | FBtr0072672      | FBgn0010246 | GO:0003774( | 0.05  | 0.06  | 0.06  | 0.16  | 0.09  | 0.17  | 2.40  | 2.87E-02 |
| A_09_P079121 | inx7         | FBtr0071034      | FBgn0027106 | GO:0005243( | 0.16  | 0.34  | 0.24  | 0.51  | 0.52  | 0.64  | 2.38  | 4.04E-02 |
| A_09_P066931 | CG6414       | FBtr0070624      | FBgn0029690 | GO:0004091( | 0.06  | 0.04  | 0.03  | 0.13  | 0.08  | 0.08  | 2.37  | 8.57E-03 |
| A_09_P172440 |              | AW943916         | Dm.31640    |             | 0.02  | 0.02  | 0.03  | 0.05  | 0.04  | 0.07  | 2.36  | 1.06E-02 |
| A_09_P161555 |              | EC264001         | Dm.34252    |             | 0.03  | 0.04  | 0.06  | 0.13  | 0.10  | 0.06  | 2.36  | 3.62E-02 |
| A_09_P038241 | CG12716      | FBtr0073752      | FBgn0030439 |             | 0.15  | 0.14  | 0.13  | 0.38  | 0.37  | 0.25  | 2.35  | 4.90E-03 |
| A_09_P039486 | CG13012      | FBtr0290216      | FBgn0030769 |             | 0.23  | 0.19  | 0.18  | 0.46  | 0.51  | 0.43  | 2.34  | 2.61E-05 |
| A_09_P066806 | CG3603       | FBtr0070558      | FBgn0029648 | GO:0005488( | 0.14  | 0.23  | 0.19  | 0.51  | 0.39  | 0.41  | 2.32  | 7.59E-04 |
| A_09_P038871 | RpL37a       | FBtr0074027      | FBgn0030616 | GO:0003735( | 0.19  | 0.24  | 0.30  | 0.47  | 0.56  | 0.62  | 2.31  | 2.00E-03 |
| A_09_P195970 |              | TC248077         |             |             | 0.06  | 0.07  | 0.08  | 0.24  | 0.13  | 0.13  | 2.30  | 2.62E-02 |
| A_09_P071976 | CG14237      | FBtr0085013      | FBgn0039428 |             | 0.03  | 0.03  | 0.02  | 0.09  | 0.04  | 0.06  | 2.29  | 4.17E-02 |
| A_09_P000686 | His1:CG33804 | FBtr0091808      | FBgn0053804 | GO:0003677( | 0.05  | 0.12  | 0.10  | 0.23  | 0.22  | 0.14  | 2.29  | 3.10E-02 |
| A_09_P166070 |              | TC240284         |             |             | 0.05  | 0.07  | 0.05  | 0.12  | 0.12  | 0.14  | 2.28  | 1.18E-03 |
| A_09_P031456 | nompA        | FBtr0089381      | FBgn0016047 | GO:0005576( | 0.04  | 0.03  | 0.03  | 0.08  | 0.07  | 0.09  | 2.27  | 2.44E-03 |
| A_09_P115600 |              | RH09469          | Dm.31030    |             | 0.36  | 0.42  | 0.60  | 0.99  | 0.98  | 1.07  | 2.27  | 1.06E-02 |
| A_09_P025191 | CG42326      | FBtr0299788      | FBgn0259226 |             | 0.03  | 0.03  | 0.02  | 0.06  | 0.04  | 0.06  | 2.26  | 9.66E-03 |
| A_09_P172890 |              | BG637820         | Dm.31834    |             | 0.14  | 0.32  | 0.22  | 0.63  | 0.38  | 0.45  | 2.25  | 4.76E-02 |
| A_09_P203140 | CG42849      | FBtr0304014      | FBgn0262096 |             | 0.13  | 0.22  | 0.20  | 0.55  | 0.32  | 0.35  | 2.24  | 1.63E-02 |
| A_09_P196265 |              |                  |             |             | 0.09  | 0.10  | 0.07  | 0.19  | 0.19  | 0.18  | 2.23  | 3.09E-04 |
| A_09_P042291 | exu          | FBtr0086242      | FBgn0000615 | GO:0000398( | 0.04  | 0.04  | 0.03  | 0.07  | 0.10  | 0.07  | 2.23  | 1.11E-02 |
| A_09_P119495 | dl           | FBtr0081006      | FBgn0260632 | GO:0000122( | 0.22  | 0.27  | 0.22  | 0.63  | 0.35  | 0.64  | 2.20  | 3.31E-02 |
| A_09_P063581 |              | IP03442          | Dm.27499    |             | 0.07  | 0.10  | 0.11  | 0.16  | 0.23  | 0.22  | 2.19  | 4.37E-03 |
| A_09_P125675 | Rrp4         | FBtr0072111      | FBgn0034879 | GO:0000175( | 0.02  | 0.05  | 0.05  | 0.09  | 0.07  | 0.09  | 2.18  | 4.26E-02 |
| A_09_P115535 | CG9897       | FBtr0071989      | FBgn0034807 | GO:0004252( | 0.04  | 0.05  | 0.02  | 0.09  | 0.10  | 0.06  | 2.15  | 4.36E-02 |
| A_09_P052731 | CG11350      | FBtr0073307      | FBgn0035552 |             | 0.08  | 0.04  | 0.04  | 0.15  | 0.08  | 0.12  | 2.14  | 2.59E-02 |
| A_09_P035931 | CG12582      | FBtr0078964      | FBgn0037215 | GO:0004567( | 0.19  | 0.35  | 0.24  | 0.51  | 0.62  | 0.51  | 2.14  | 2.49E-02 |
| A_09_P125740 | CG9293       | FBtr0080525      | FBgn0032516 | GO:0008270( | 0.11  | 0.08  | 0.13  | 0.18  | 0.22  | 0.26  | 2.13  | 5.13E-03 |
| A_09_P069956 | CG15497      | FBtr0084113      | FBgn0038894 |             | 0.06  | 0.08  | 0.08  | 0.15  | 0.14  | 0.18  | 2.13  | 4.97E-05 |

| Systematic   | GeneSymbol | PrimaryAccession | UniGeneID   | GO          | 0.64 | 0.83  | 0.58  | 1.10  | 1.57  | 1.70  | Ratio | P-value  |
|--------------|------------|------------------|-------------|-------------|------|-------|-------|-------|-------|-------|-------|----------|
| A_09_P186545 | Hsp27      | FBr0076454       | FBgn0001226 | GO:0005875( | 0.64 | 0.83  | 0.58  | 1.10  | 1.57  | 1.70  | 2.12  | 5.17E-03 |
| A_09_P187970 |            |                  |             |             | 0.17 | 0.20  | 0.23  | 0.57  | 0.35  | 0.35  | 2.09  | 1.38E-02 |
| A_09_P031116 | CycB3      | FBr0084728       | FBgn0015625 | GO:0000281( | 0.04 | 0.04  | 0.05  | 0.08  | 0.09  | 0.09  | 2.09  | 1.94E-03 |
| A_09_P018421 | CG4259     | FBr0077854       | FBgn0031389 | GO:0004252( | 0.05 | 0.07  | 0.05  | 0.17  | 0.08  | 0.11  | 2.08  | 4.25E-02 |
| A_09_P007436 | CG6347     | FBr0087637       | FBgn0033874 | GO:0004197( | 0.05 | 0.06  | 0.05  | 0.10  | 0.10  | 0.12  | 2.08  | 6.56E-04 |
| A_09_P062806 | CG3526     | FBr0070546       | FBgn0040355 | GO:0005622( | 0.06 | 0.05  | 0.05  | 0.16  | 0.09  | 0.09  | 2.06  | 2.90E-02 |
| A_09_P215595 | CG9812     | FBr0306150       | FBgn0034860 |             | 0.05 | 0.05  | 0.04  | 0.14  | 0.07  | 0.11  | 2.06  | 3.93E-02 |
| A_09_P114075 | CG15579    | FBr0070657       | FBgn0040906 |             | 0.32 | 0.31  | 0.26  | 0.75  | 0.57  | 0.52  | 2.05  | 1.11E-03 |
| A_09_P054871 | CG7607     | FBr0076163       | FBgn0036145 |             | 9.86 | 10.94 | 12.82 | 21.54 | 24.71 | 21.86 | 2.03  | 7.59E-05 |
| A_09_P177560 |            | TC236023         |             |             | 0.11 | 0.11  | 0.07  | 0.23  | 0.20  | 0.16  | 2.03  | 5.21E-03 |
| A_09_P002011 | CG32335    | FBr0273416       | FBgn0063667 | GO:0005634( | 0.04 | 0.04  | 0.04  | 0.08  | 0.08  | 0.09  | 2.00  | 1.04E-03 |
| A_09_P101550 | CG4041     | FBr0300998       | FBgn0029736 | GO:0004672( | 0.17 | 0.19  | 0.29  | 0.42  | 0.49  | 0.36  | 2.00  | 2.06E-02 |
| A_09_P220545 |            |                  |             |             | 0.51 | 0.28  | 0.43  | 0.23  | 0.17  | 0.19  | 0.50  | 3.06E-02 |
| A_09_P059916 | CG31462    | FBr0081851       | FBgn0051462 |             | 0.14 | 0.08  | 0.09  | 0.06  | 0.06  | 0.04  | 0.50  | 2.36E-02 |
| A_09_P039381 | CalpC      | FBr0074226       | FBgn0260450 | GO:0004198( | 0.25 | 0.27  | 0.26  | 0.14  | 0.12  | 0.12  | 0.49  | 2.39E-03 |
| A_09_P197010 | CG34391    | FBr0112634       | FBgn0085420 |             | 0.13 | 0.08  | 0.11  | 0.04  | 0.06  | 0.05  | 0.49  | 1.22E-02 |
| A_09_P174340 | CG6356     | FBr0084601       | FBgn0039178 | GO:0008513( | 0.95 | 0.76  | 1.14  | 0.41  | 0.39  | 0.62  | 0.49  | 1.02E-02 |
| A_09_P123675 | Drep-2     | FBr0088597       | FBgn0028408 | GO:0005622( | 0.28 | 0.16  | 0.19  | 0.10  | 0.12  | 0.08  | 0.49  | 1.45E-02 |
| A_09_P118705 |            | TC248180         |             | GO:0005643( | 0.09 | 0.07  | 0.08  | 0.06  | 0.03  | 0.04  | 0.49  | 1.28E-02 |
| A_09_P166290 | boi        | FBr0114528       | FBgn0040388 | GO:0007155( | 0.09 | 0.08  | 0.05  | 0.04  | 0.04  | 0.03  | 0.48  | 1.82E-02 |
| A_09_P067621 | CG42340    | FBr0299863       | FBgn0259242 | GO:0005267( | 0.05 | 0.05  | 0.06  | 0.02  | 0.03  | 0.03  | 0.48  | 1.37E-02 |
| A_09_P180500 | CG8709     | FBr0303580       | FBgn0033269 | GO:0005737( | 0.07 | 0.04  | 0.06  | 0.04  | 0.02  | 0.03  | 0.48  | 3.19E-02 |
| A_09_P197225 |            | NP535325         |             |             | 0.10 | 0.09  | 0.12  | 0.06  | 0.05  | 0.04  | 0.48  | 4.46E-03 |
| A_09_P040746 | CG9576     | FBr0070027       | FBgn0031091 | GO:0008270( | 0.06 | 0.06  | 0.10  | 0.04  | 0.04  | 0.03  | 0.48  | 2.52E-02 |
| A_09_P145565 | norpA      | FBr0301475       | FBgn0262738 |             | 0.59 | 0.41  | 0.43  | 0.24  | 0.21  | 0.22  | 0.47  | 1.78E-03 |
| A_09_P211350 | CG17838    | FBr0083961       | FBgn0038826 | GO:0000166( | 1.43 | 1.04  | 0.75  | 0.54  | 0.66  | 0.33  | 0.47  | 4.43E-02 |
| A_09_P131435 | odd        | FBr0077557       | FBgn0002985 | GO:0003676( | 0.11 | 0.08  | 0.08  | 0.06  | 0.05  | 0.03  | 0.47  | 2.58E-02 |
| A_09_P182195 | Pka-R1     | FBr0299891       | FBgn0259243 | GO:0001932( | 0.30 | 0.24  | 0.25  | 0.12  | 0.13  | 0.13  | 0.47  | 7.77E-05 |
| A_09_P104655 | Mcm3       | FBr0070762       | FBgn0024332 | GO:0003677( | 0.21 | 0.19  | 0.25  | 0.08  | 0.11  | 0.11  | 0.47  | 6.97E-04 |
| A_09_P192270 |            | TC247933         |             |             | 0.35 | 0.23  | 0.19  | 0.10  | 0.11  | 0.15  | 0.46  | 1.57E-02 |
| A_09_P219135 |            |                  |             |             | 1.91 | 1.35  | 1.42  | 0.79  | 0.62  | 0.73  | 0.46  | 7.57E-04 |
| A_09_P226155 | Hr46       | FBr0306346       | FBgn0000448 | GO:0003700( | 0.36 | 0.24  | 0.24  | 0.15  | 0.12  | 0.11  | 0.46  | 3.69E-03 |
| A_09_P191475 | CG42492    | FBr0300464       | FBgn0259994 |             | 1.76 | 1.02  | 1.24  | 0.71  | 0.50  | 0.60  | 0.46  | 1.02E-02 |
| A_09_P000101 | D2R        | FBr0091461       | FBgn0053517 | GO:0001591( | 0.13 | 0.08  | 0.07  | 0.03  | 0.07  | 0.03  | 0.46  | 3.53E-02 |
| A_09_P204390 | CG40351    | FBr0113870       | FBgn0040022 | GO:0000166( | 0.12 | 0.10  | 0.10  | 0.05  | 0.04  | 0.06  | 0.45  | 1.78E-03 |
| A_09_P035096 | CG11796    | FBr0078226       | FBgn0036992 | GO:0003868( | 0.03 | 0.05  | 0.07  | 0.02  | 0.02  | 0.02  | 0.45  | 3.35E-02 |
| A_09_P197265 | CG2681     | FBr0070480       | FBgn0024997 | GO:0004842( | 0.50 | 0.49  | 0.50  | 0.24  | 0.22  | 0.21  | 0.45  | 9.09E-05 |
| A_09_P071831 | CG5948     | FBr0084939       | FBgn0039386 | GO:0006801( | 0.10 | 0.10  | 0.14  | 0.05  | 0.05  | 0.05  | 0.44  | 1.60E-03 |
| A_09_P003491 | CG34264    | FBr0306849       | FBgn0085293 |             | 0.05 | 0.08  | 0.13  | 0.04  | 0.04  | 0.03  | 0.44  | 1.68E-02 |
| A_09_P164055 | CG34306    | FBr0112502       | FBgn0085335 |             | 0.05 | 0.03  | 0.05  | 0.01  | 0.02  | 0.03  | 0.43  | 1.37E-02 |
| A_09_P216680 | CG42492    | FBr0300464       | FBgn0259994 |             | 2.06 | 1.17  | 1.39  | 0.79  | 0.55  | 0.61  | 0.43  | 9.79E-03 |
| A_09_P069291 | CG11391    | FBr0083789       | FBgn0038732 | GO:0003824( | 0.19 | 0.11  | 0.15  | 0.08  | 0.06  | 0.06  | 0.43  | 1.77E-03 |
| A_09_P072621 | CG42796    | FBr0303603       | FBgn0261929 | GO:0004993( | 0.10 | 0.06  | 0.09  | 0.02  | 0.05  | 0.03  | 0.42  | 1.54E-02 |
| A_09_P043891 | nod        | FBr0073516       | FBgn0002948 | GO:0003677( | 0.15 | 0.11  | 0.11  | 0.06  | 0.07  | 0.03  | 0.41  | 1.80E-02 |
| A_09_P193985 |            | TC243529         |             |             | 0.53 | 0.49  | 0.63  | 0.19  | 0.24  | 0.25  | 0.41  | 2.01E-05 |
| A_09_P220670 |            | TC242940         |             |             | 0.05 | 0.04  | 0.05  | 0.03  | 0.02  | 0.01  | 0.40  | 4.00E-02 |
| A_09_P078831 | l(1)G0045  | FBr0070782       | FBgn0026702 | GO:0001682( | 0.09 | 0.08  | 0.09  | 0.05  | 0.02  | 0.03  | 0.40  | 3.01E-02 |
| A_09_P053166 | CG6602     | FBr0077047       | FBgn0035673 |             | 0.36 | 0.45  | 0.30  | 0.13  | 0.10  | 0.24  | 0.40  | 4.60E-02 |
| A_09_P090165 | CG4857     | FBr0305180       | FBgn0026083 |             | 0.38 | 0.29  | 0.23  | 0.12  | 0.13  | 0.10  | 0.40  | 2.30E-03 |
| A_09_P185440 |            | GH26506          | Dm.29317    |             | 1.98 | 1.98  | 1.87  | 0.75  | 0.73  | 0.82  | 0.39  | 2.76E-05 |
| A_09_P011896 | GstD5      | FBr0082572       | FBgn0010041 | GO:0004364( | 0.10 | 0.10  | 0.15  | 0.05  | 0.04  | 0.05  | 0.39  | 1.06E-03 |
| A_09_P063791 | CG42492    | FBr0300464       | FBgn0259994 |             | 1.52 | 0.98  | 1.48  | 0.56  | 0.41  | 0.56  | 0.39  | 2.43E-03 |
| A_09_P178841 | CG40813    | FBr0113934       | FBgn0085521 |             | 0.11 | 0.18  | 0.09  | 0.06  | 0.04  | 0.04  | 0.39  | 1.32E-02 |
| A_09_P176495 |            | BP559788         | Dm.33278    |             | 0.25 | 0.31  | 0.28  | 0.17  | 0.07  | 0.10  | 0.38  | 4.22E-02 |
| A_09_P224960 |            |                  |             |             | 0.09 | 0.11  | 0.09  | 0.03  | 0.03  | 0.05  | 0.38  | 4.00E-03 |

| Systematic   | GeneSymbol | PrimaryAccession | UniGeneID   | GO          | normaliz | normaliz | normaliz | normaliz | normaliz | normaliz | Ratio | P-value  |
|--------------|------------|------------------|-------------|-------------|----------|----------|----------|----------|----------|----------|-------|----------|
| A_09_P221790 |            | TC243589         |             |             | 0.26     | 0.16     | 0.12     | 0.08     | 0.08     | 0.04     | 0.38  | 2.06E-02 |
| A_09_P210670 | CG34205    | FBr0112398       | FBgn0085234 |             | 0.07     | 0.05     | 0.08     | 0.03     | 0.02     | 0.03     | 0.38  | 1.06E-02 |
| A_09_P035611 | CG14567    | FBr0078454       | FBgn0037126 |             | 0.11     | 0.11     | 0.07     | 0.04     | 0.03     | 0.04     | 0.37  | 3.20E-03 |
| A_09_P181920 |            | TC238641         |             |             | 0.09     | 0.21     | 0.19     | 0.07     | 0.07     | 0.04     | 0.37  | 3.44E-02 |
| A_09_P205240 |            | CO332204         | Dm.29000    |             | 0.43     | 0.73     | 0.95     | 0.31     | 0.21     | 0.22     | 0.37  | 2.43E-02 |
| A_09_P066711 | CG14778    | FBr0070254       | FBgn0029580 | GO:0005778( | 0.37     | 0.33     | 0.40     | 0.12     | 0.16     | 0.12     | 0.36  | 7.67E-05 |
| A_09_P066186 | CG31672    | FBr0077825       | FBgn0028952 |             | 0.07     | 0.06     | 0.07     | 0.05     | 0.02     | 0.02     | 0.36  | 4.06E-02 |
| A_09_P090472 |            | SD26211          |             |             | 0.14     | 0.13     | 0.20     | 0.06     | 0.06     | 0.05     | 0.35  | 8.65E-04 |
| A_09_P203005 | Nc73EF     | FBr0075269       | FBgn0010352 | GO:0004591( | 0.12     | 0.09     | 0.07     | 0.03     | 0.06     | 0.02     | 0.35  | 3.32E-02 |
| A_09_P211035 | CG13375    | FBr0300326       | FBgn0040370 | GO:0003924( | 0.17     | 0.18     | 0.11     | 0.07     | 0.06     | 0.03     | 0.35  | 1.22E-02 |
| A_09_P066466 | tyn        | FBr0100135       | FBgn0029128 | GO:0003674( | 2.25     | 1.79     | 1.89     | 0.78     | 0.61     | 0.66     | 0.35  | 2.07E-06 |
| A_09_P066706 | CG14770    | FBr0070213       | FBgn0029573 |             | 0.21     | 0.15     | 0.21     | 0.07     | 0.07     | 0.05     | 0.34  | 9.18E-05 |
| A_09_P013826 | CG31816    | FBr0080868       | FBgn0051816 | GO:0003674( | 0.10     | 0.18     | 0.10     | 0.06     | 0.04     | 0.03     | 0.34  | 8.70E-03 |
| A_09_P039951 | CG6788     | FBr0074495       | FBgn0030880 | GO:0005102( | 0.32     | 0.53     | 0.42     | 0.22     | 0.15     | 0.08     | 0.33  | 3.45E-02 |
| A_09_P077961 | RhoGAPIA   | FBr0112919       | FBgn0025836 | GO:0005089( | 2.54     | 2.06     | 2.47     | 0.71     | 0.76     | 0.89     | 0.33  | 2.59E-07 |
| A_09_P225685 | CG7852     | FBr0072736       | FBgn0035229 |             | 0.09     | 0.06     | 0.12     | 0.03     | 0.01     | 0.05     | 0.32  | 2.69E-02 |
| A_09_P009671 | Sxl        | FBr0100206       | FBgn0003659 | GO:0000166( | 0.75     | 0.73     | 0.98     | 0.24     | 0.28     | 0.27     | 0.32  | 2.38E-05 |
| A_09_P032696 | Crg-I      | FBr0070599       | FBgn0021738 | GO:0003700( | 0.46     | 0.52     | 0.57     | 0.22     | 0.13     | 0.14     | 0.31  | 3.83E-03 |
| A_09_P058106 | CG30334    | FBr0087949       | FBgn0050334 | GO:0003674( | 0.05     | 0.13     | 0.08     | 0.02     | 0.04     | 0.02     | 0.31  | 1.62E-02 |
| A_09_P013211 | Cyp4d2     | FBr0070387       | FBgn0011576 | GO:0004497( | 3.66     | 3.01     | 2.76     | 0.92     | 0.91     | 1.05     | 0.31  | 3.45E-06 |
| A_09_P038441 | Ndc80      | FBr0073850       | FBgn0030500 | GO:0000776( | 0.10     | 0.09     | 0.09     | 0.03     | 0.03     | 0.02     | 0.31  | 8.05E-04 |
| A_09_P171335 | CG42492    | FBr0300464       | FBgn0259994 |             | 0.33     | 0.18     | 0.16     | 0.07     | 0.07     | 0.05     | 0.29  | 9.35E-03 |
| A_09_P004731 |            |                  |             |             | 0.07     | 0.17     | 0.15     | 0.04     | 0.02     | 0.05     | 0.29  | 1.22E-02 |
| A_09_P062881 | CG13375    | FBr0070103       | FBgn0040370 | GO:0003924( | 0.23     | 0.15     | 0.15     | 0.05     | 0.06     | 0.03     | 0.29  | 2.82E-04 |
| A_09_P067481 | CG5966     | FBr0070866       | FBgn0029831 | GO:0004806( | 0.06     | 0.13     | 0.17     | 0.02     | 0.03     | 0.04     | 0.28  | 2.26E-02 |
| A_09_P063846 | CG12643    | FBr0071481       | FBgn0040942 |             | 0.06     | 0.05     | 0.09     | 0.02     | 0.02     | 0.01     | 0.27  | 1.81E-02 |
| A_09_P072221 | CG17189    | FBr0085105       | FBgn0039485 |             | 0.24     | 0.65     | 0.33     | 0.11     | 0.08     | 0.11     | 0.27  | 2.29E-02 |
| A_09_P075926 | CG17560    | FBr0083330       | FBgn0038450 | GO:0005488( | 1.28     | 2.41     | 1.70     | 0.34     | 0.32     | 0.82     | 0.26  | 2.29E-02 |
| A_09_P113455 | CG17189    | FBr0085105       | FBgn0039485 |             | 0.48     | 1.23     | 0.67     | 0.15     | 0.11     | 0.35     | 0.24  | 3.32E-02 |
| A_09_P184910 |            |                  |             |             | 4.15     | 4.27     | 3.90     | 1.02     | 0.81     | 1.15     | 0.24  | 2.31E-05 |
| A_09_P042081 | dsx        | FBr0081759       | FBgn0000504 | GO:0000122( | 0.37     | 0.30     | 0.30     | 0.10     | 0.07     | 0.07     | 0.24  | 1.27E-05 |
| A_09_P062741 | CG3706     | FBr0070189       | FBgn0040342 |             | 0.10     | 0.11     | 0.12     | 0.03     | 0.02     | 0.02     | 0.24  | 6.26E-04 |
| A_09_P036646 | CG1077     | FBr0078587       | FBgn0037405 |             | 0.11     | 0.10     | 0.09     | 0.02     | 0.05     | 0.02     | 0.24  | 1.33E-02 |
| A_09_P214560 |            | IPI1223          | Dm.32757    |             | 0.08     | 0.13     | 0.18     | 0.04     | 0.03     | 0.02     | 0.23  | 7.84E-03 |
| A_09_P001411 |            | TC237620         |             |             | 0.05     | 0.09     | 0.10     | 0.02     | 0.01     | 0.02     | 0.22  | 8.69E-04 |
| A_09_P074216 | CG12256    | FBr0082621       | FBgn0038002 | GO:0004252( | 0.44     | 0.40     | 1.32     | 0.19     | 0.10     | 0.14     | 0.22  | 3.74E-02 |
| A_09_P171190 |            | BP550583         | Dm.36834    |             | 0.87     | 1.34     | 1.00     | 0.35     | 0.15     | 0.16     | 0.19  | 9.23E-03 |
| A_09_P047886 |            | GHI4214          | Dm.33174    |             | 1.51     | 0.99     | 1.02     | 0.25     | 0.17     | 0.25     | 0.19  | 1.00E-04 |
| A_09_P217945 | CG11391    | FBr0083789       | FBgn0038732 | GO:0003824( | 0.11     | 0.05     | 0.06     | 0.03     | 0.01     | 0.01     | 0.19  | 8.97E-03 |
| A_09_P067806 | CG4586     | FBr0071003       | FBgn0029924 | GO:0003995( | 0.47     | 0.50     | 0.48     | 0.08     | 0.11     | 0.08     | 0.19  | 4.91E-05 |
| A_09_P210350 |            | RT01029          | Dm.26438    |             | 0.06     | 0.10     | 0.06     | 0.02     | 0.01     | 0.01     | 0.18  | 6.04E-03 |
| A_09_P205860 |            | TC247042         |             |             | 0.07     | 0.06     | 0.08     | 0.01     | 0.02     | 0.01     | 0.17  | 1.26E-02 |
| A_09_P218595 |            | Y13272           | Dm.1882     |             | 1.73     | 2.13     | 1.49     | 0.49     | 0.26     | 0.22     | 0.17  | 6.01E-03 |
| A_09_P174680 |            | CO327868         | Dm.32559    |             | 0.58     | 0.84     | 0.86     | 0.12     | 0.10     | 0.16     | 0.16  | 3.98E-05 |
| A_09_P090610 |            | FBr0300134       | Dm.35092    |             | 0.09     | 0.14     | 0.11     | 0.01     | 0.04     | 0.02     | 0.16  | 4.01E-03 |
| A_09_P179511 |            | TC237266         |             |             | 0.05     | 0.07     | 0.07     | 0.01     | 0.00     | 0.03     | 0.14  | 1.07E-02 |
| A_09_P176280 |            | BP556550         | Dm.33227    |             | 0.12     | 0.20     | 0.15     | 0.02     | 0.03     | 0.02     | 0.14  | 3.18E-04 |
| A_09_P047876 |            | GHI3568          |             |             | 0.46     | 0.33     | 0.39     | 0.11     | 0.04     | 0.03     | 0.13  | 1.95E-02 |
| A_09_P077201 | CG2709     | FBr0070486       | FBgn0024977 | GO:0008270( | 0.08     | 0.10     | 0.12     | 0.01     | 0.01     | 0.02     | 0.11  | 2.51E-03 |
| A_09_P193035 |            | SD07644          | Dm.169      |             | 1.26     | 1.57     | 1.94     | 0.20     | 0.13     | 0.17     | 0.10  | 1.27E-05 |
| A_09_P191320 |            |                  |             |             | 0.09     | 0.10     | 0.08     | 0.01     | 0.00     | 0.01     | 0.10  | 1.22E-02 |
| A_09_P180045 |            | SD26211          |             |             | 5.49     | 6.27     | 7.01     | 0.61     | 0.50     | 0.62     | 0.09  | 9.20E-10 |
| A_09_P164270 |            | ATI4183          | Dm.35097    |             | 0.14     | 0.21     | 0.19     | 0.02     | 0.02     | 0.01     | 0.09  | 2.49E-03 |
| A_09_P004671 | CG40635    | NM_001110696     | Dm.36091    |             | 0.14     | 0.18     | 0.17     | 0.01     | 0.01     | 0.02     | 0.09  | 7.38E-06 |
| A_09_P165765 |            | TC240084         |             |             | 0.07     | 0.10     | 0.10     | 0.01     | 0.00     | 0.02     | 0.08  | 6.73E-03 |

| Systematic   | GeneSymbol | PrimaryAccession | UniGeneID   | GO          | norm  | norm  | norm  | norm | norm | norm | Ratio | P-value  |
|--------------|------------|------------------|-------------|-------------|-------|-------|-------|------|------|------|-------|----------|
| A_09_PI65825 |            | GH14228          | Dm.4050     |             | 0.31  | 0.29  | 0.29  | 0.01 | 0.02 | 0.02 | 0.05  | 4.88E-04 |
| A_09_PI44698 |            | TC243186         |             |             | 0.96  | 1.51  | 1.62  | 0.07 | 0.04 | 0.04 | 0.04  | 3.48E-06 |
| A_09_PI01950 |            | FBr0300162       | Dm.35092    |             | 0.21  | 0.31  | 0.16  | 0.01 | 0.00 | 0.01 | 0.04  | 8.89E-04 |
| A_09_P051783 |            | FBr0300146       | Dm.36727    |             | 0.31  | 0.33  | 0.30  | 0.01 | 0.02 | 0.01 | 0.03  | 1.81E-03 |
| A_09_P091170 | roX1       | NR_002097        | Dm.20295    | GO:0000805( | 15.33 | 14.59 | 12.49 | 0.34 | 0.32 | 0.45 | 0.03  | 1.08E-07 |
| A_09_PI62605 | CG13762    | FBr0300708       | FBgn0040333 | GO:0005262( | 1.03  | 1.23  | 0.98  | 0.03 | 0.02 | 0.03 | 0.02  | 1.11E-04 |
| A_09_P051786 |            | FBr0300172       | Dm.36902    |             | 0.91  | 1.42  | 1.32  | 0.03 | 0.02 | 0.02 | 0.02  | 1.98E-04 |
| A_09_PI87380 |            | TC245454         |             |             | 0.38  | 0.52  | 0.47  | 0.01 | 0.01 | 0.01 | 0.02  | 1.08E-03 |
| A_09_P090105 | roX1       | NR_002098        | Dm.20295    | GO:0000805( | 7.36  | 7.68  | 2.88  | 0.13 | 0.12 | 0.11 | 0.02  | 3.94E-03 |
| A_09_PI08980 | roX1       | NR_002098        | Dm.20295    | GO:0000805( | 33.00 | 31.62 | 29.20 | 0.62 | 0.60 | 0.82 | 0.02  | 4.92E-08 |
| A_09_P091310 | roX2       | NR_002105        | Dm.1443     | GO:0000805( | 13.00 | 18.93 | 15.35 | 0.37 | 0.22 | 0.32 | 0.02  | 1.64E-06 |
| A_09_P062696 |            | NPI75338         |             |             | 0.81  | 0.90  | 0.89  | 0.01 | 0.01 | 0.01 | 0.01  | 2.12E-06 |
| A_09_PI82115 | roX1       | NR_002098        | Dm.20295    | GO:0000805( | 10.16 | 7.33  | 7.60  | 0.09 | 0.11 | 0.06 | 0.01  | 1.06E-05 |
| A_09_PI83535 |            | TC246484         |             |             | 3.76  | 4.40  | 3.69  | 0.02 | 0.03 | 0.04 | 0.01  | 4.52E-07 |

## Overlap of 284 genes differentially expressed in BBB Males vs. Females with Gene Ontology classifications

Category=the name of the category within the ontology.

Genes in Category=the total number of genes in the genome that have been assigned to the category

Genes in List in Category=the total number of genes that are both in the selected gene list and in the category.

P-value=a hypergeometric p-value without multiple testing corrections.

| Biological Process                                                                              |                   |                           |          |
|-------------------------------------------------------------------------------------------------|-------------------|---------------------------|----------|
| Category                                                                                        | Genes in Category | Genes in List in Category | p-Value  |
| GO:16457: dosage compensation complex assembly (sensu Insecta)                                  | 13                | 5                         | 6.77E-08 |
| GO:42714: dosage compensation complex assembly                                                  | 13                | 5                         | 6.77E-08 |
| GO:30237: female sex determination                                                              | 28                | 6                         | 1.55E-07 |
| GO:35079: polytene chromosome puffing                                                           | 7                 | 4                         | 2.18E-07 |
| GO:35080: heat shock-mediated polytene chromosome puffing                                       | 7                 | 4                         | 2.18E-07 |
| GO:9047: dosage compensation, by hyperactivation of X chromosome                                | 22                | 5                         | 1.30E-06 |
| GO:7549: dosage compensation                                                                    | 48                | 6                         | 4.36E-06 |
| GO:42026: protein refolding                                                                     | 15                | 4                         | 8.05E-06 |
| GO:7296: vitellogenesis                                                                         | 16                | 4                         | 1.07E-05 |
| GO:19102: male somatic sex determination                                                        | 6                 | 3                         | 1.41E-05 |
| GO:45496: male analia morphogenesis (sensu Endopterygota)                                       | 6                 | 3                         | 1.41E-05 |
| GO:45497: female analia morphogenesis (sensu Endopterygota)                                     | 6                 | 3                         | 1.41E-05 |
| GO:7530: sex determination                                                                      | 62                | 6                         | 1.97E-05 |
| GO:9408: response to heat                                                                       | 128               | 8                         | 2.06E-05 |
| GO:51084: posttranslational protein folding                                                     | 19                | 4                         | 2.22E-05 |
| GO:48086: negative regulation of pigmentation                                                   | 7                 | 3                         | 2.46E-05 |
| GO:19101: female somatic sex determination                                                      | 21                | 4                         | 3.38E-05 |
| GO:30238: male sex determination                                                                | 8                 | 3                         | 3.91E-05 |
| GO:281: cytokinesis after mitosis                                                               | 8                 | 3                         | 3.91E-05 |
| GO:9266: response to temperature stimulus                                                       | 144               | 8                         | 4.81E-05 |
| GO:48071: sex-specific pigmentation                                                             | 12                | 3                         | 1.50E-04 |
| GO:7486: female genitalia morphogenesis (sensu Endopterygota)                                   | 13                | 3                         | 1.93E-04 |
| GO:30540: female genitalia morphogenesis                                                        | 13                | 3                         | 1.93E-04 |
| GO:7487: analia morphogenesis (sensu Endopterygota)                                             | 13                | 3                         | 1.93E-04 |
| GO:7079: mitotic chromosome movement towards spindle pole                                       | 3                 | 2                         | 2.42E-04 |
| GO:7485: male genitalia morphogenesis (sensu Endopterygota)                                     | 15                | 3                         | 3.03E-04 |
| GO:35263: genital disc sexually dimorphic development                                           | 15                | 3                         | 3.03E-04 |
| GO:45498: sex comb development                                                                  | 15                | 3                         | 3.03E-04 |
| GO:45934: negative regulation of nucleobase, nucleoside, nucleotide and nucleic acid metabolism | 348               | 11                        | 3.15E-04 |
| GO:18993: somatic sex determination                                                             | 39                | 4                         | 4.10E-04 |
| GO:19099: female germ-line sex determination                                                    | 17                | 3                         | 4.47E-04 |
| GO:18992: germ-line sex determination                                                           | 18                | 3                         | 5.33E-04 |
| GO:1666: response to hypoxia                                                                    | 45                | 4                         | 7.12E-04 |
| GO:7484: genitalia morphogenesis (sensu Endopterygota)                                          | 20                | 3                         | 7.35E-04 |
| GO:19953: sexual reproduction                                                                   | 1413              | 25                        | 7.67E-04 |
| GO:92: mitotic anaphase B                                                                       | 5                 | 2                         | 7.96E-04 |
| GO:7548: sex differentiation                                                                    | 168               | 7                         | 8.28E-04 |
| GO:8608: attachment of spindle microtubules to kinetochore                                      | 6                 | 2                         | 1.19E-03 |
| GO:51305: chromosome movement towards spindle pole                                              | 6                 | 2                         | 1.19E-03 |
| GO:31324: negative regulation of cellular metabolism                                            | 420               | 11                        | 1.48E-03 |
| GO:50832: defense response to fungi                                                             | 56                | 4                         | 1.63E-03 |
| GO:45944: positive regulation of transcription from RNA polymerase II promoter                  | 96                | 5                         | 1.77E-03 |
| GO:86: G2/M transition of mitotic cell cycle                                                    | 27                | 3                         | 1.80E-03 |
| GO:9620: response to fungi                                                                      | 59                | 4                         | 1.97E-03 |
| GO:16481: negative regulation of transcription                                                  | 312               | 9                         | 2.10E-03 |
| GO:45892: negative regulation of transcription, DNA-dependent                                   | 312               | 9                         | 2.10E-03 |
| GO:7483: genital disc morphogenesis                                                             | 29                | 3                         | 2.22E-03 |
| GO:48070: regulation of developmental pigmentation                                              | 30                | 3                         | 2.45E-03 |
| GO:30730: sequestering of triacylglycerol                                                       | 9                 | 2                         | 2.80E-03 |
| GO:9892: negative regulation of metabolism                                                      | 458               | 11                        | 2.92E-03 |
| GO:7276: gametogenesis                                                                          | 1385              | 23                        | 2.93E-03 |
| GO:7277: pole cell development                                                                  | 33                | 3                         | 3.23E-03 |
| GO:50000: chromosome localization                                                               | 33                | 3                         | 3.23E-03 |
